# Supplementary material for: Knoevenagel condensations of 1,3-dicarbonyl compounds with aldehydes catalyzed by heterogeneous Ps-AlCl3 without solvents
Source: Royal Society of Chemistry journal article supplement (doi:10.1039/c2ra21571c), 2012-01-01
Supplement: c2ra21571c.pdf [file c2ra21571c.pdf]

### GC-MS spectrum of condensation of benzaldehyde with acetylacetone

文件 : C:\msdchem\1\DATA\ZY0217-1.D  
操作员 :  
已采集 : 17 Feb 2012 14:06 , 使用采集方法 zjk.M  
仪器: 仪器 1  
样品名:  
其他信息 :  
样品瓶号: 1

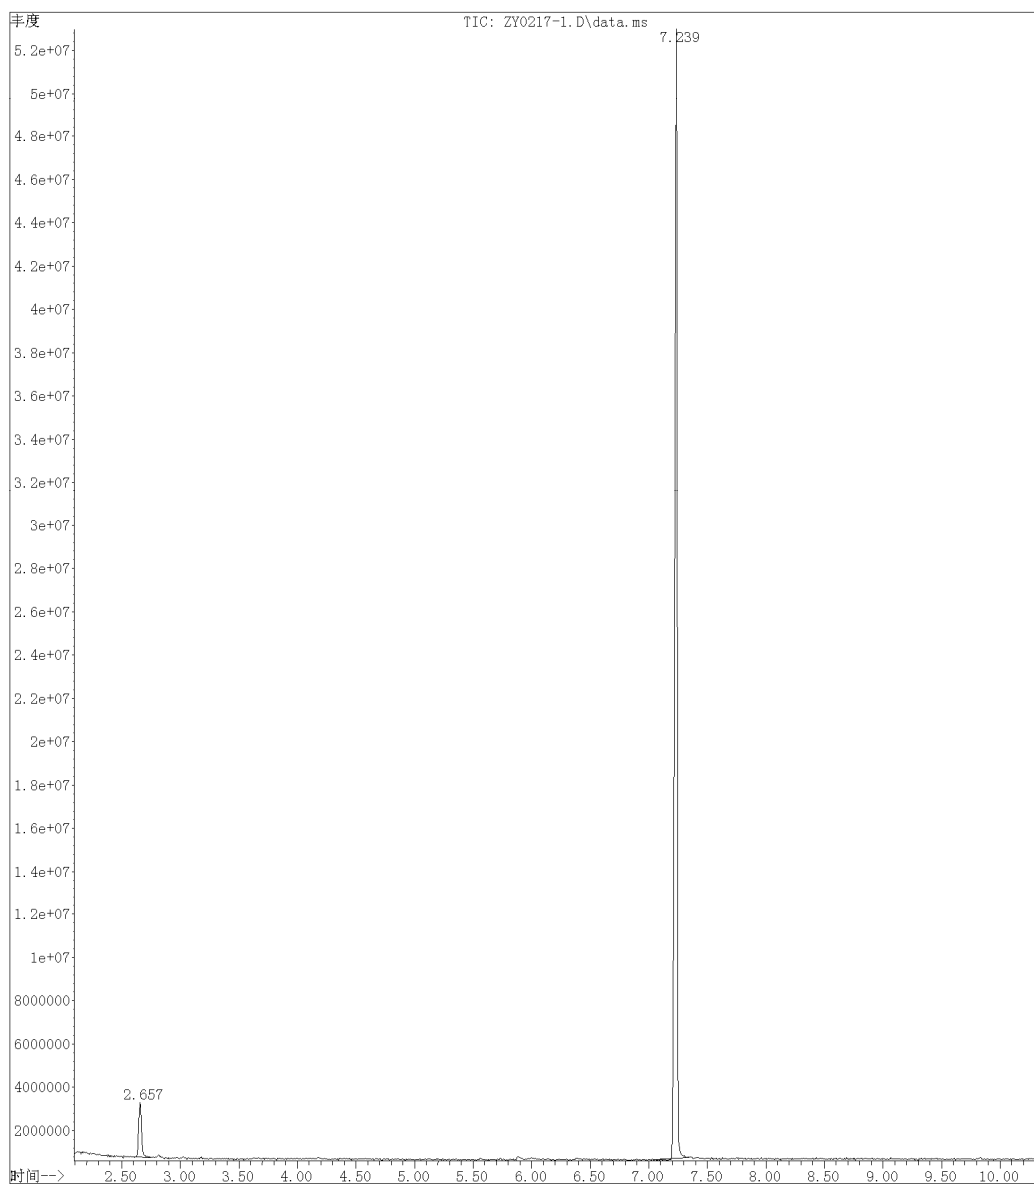

已检索库: C:\Database\NIST05a.L  
质量 : 95  
ID: Benzaldehyde

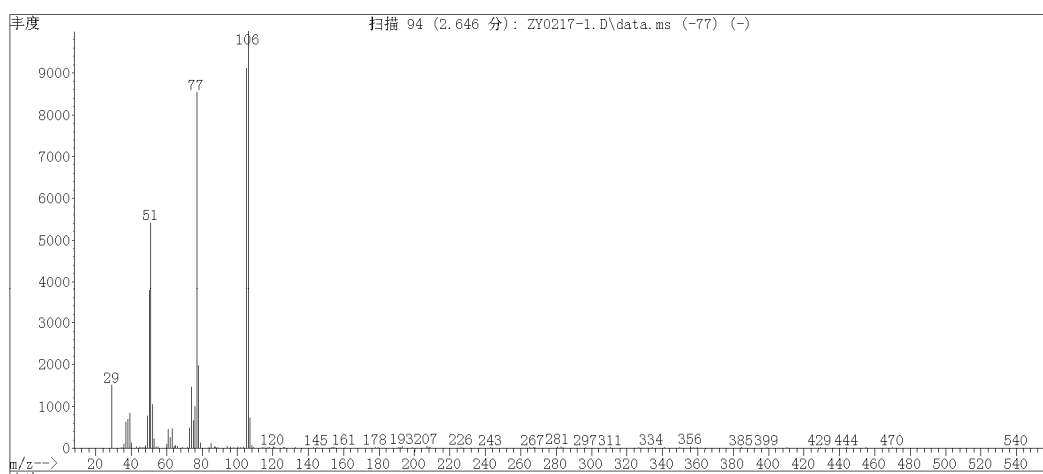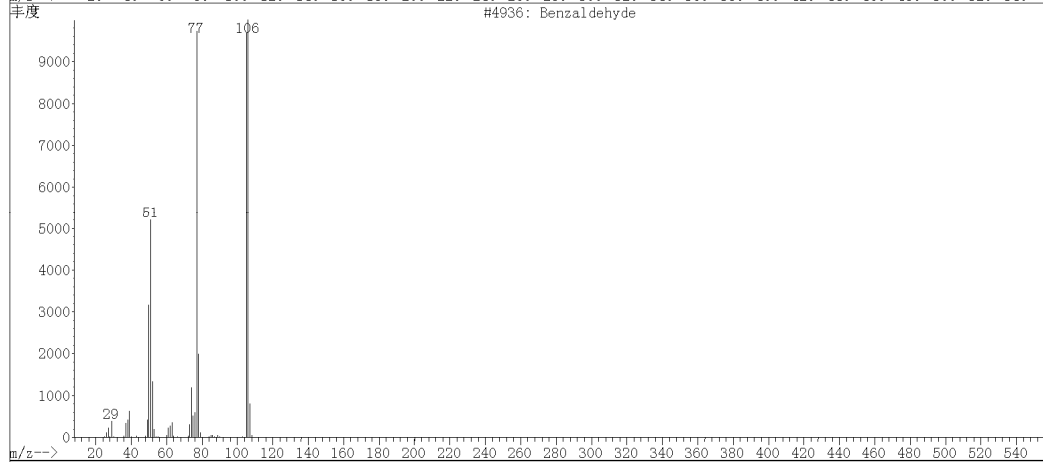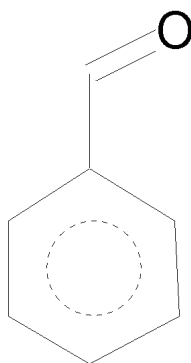

已检索库: C:\Database\NIST05a.L  
质量 : 97  
ID : 3-Benzylidene-2,4-pentanedione

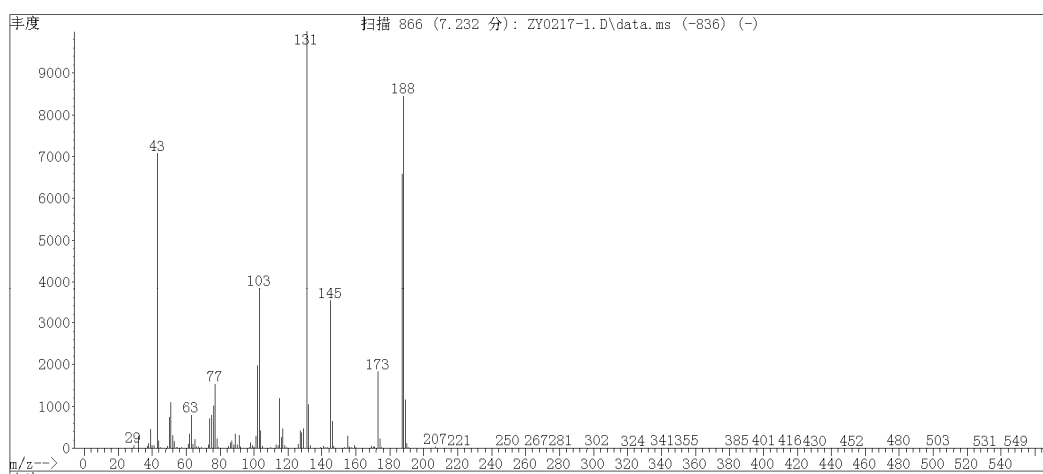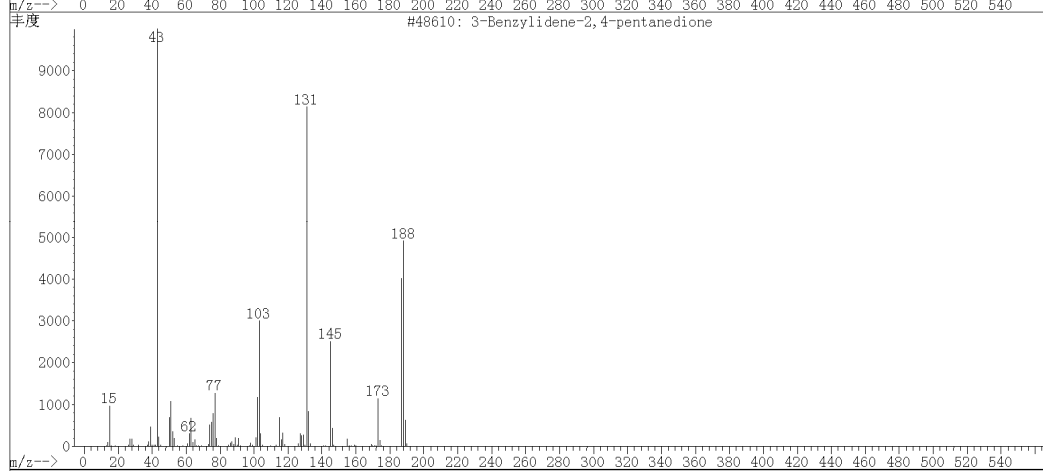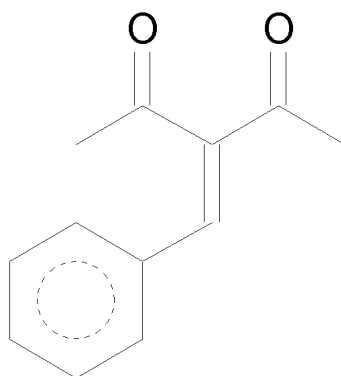

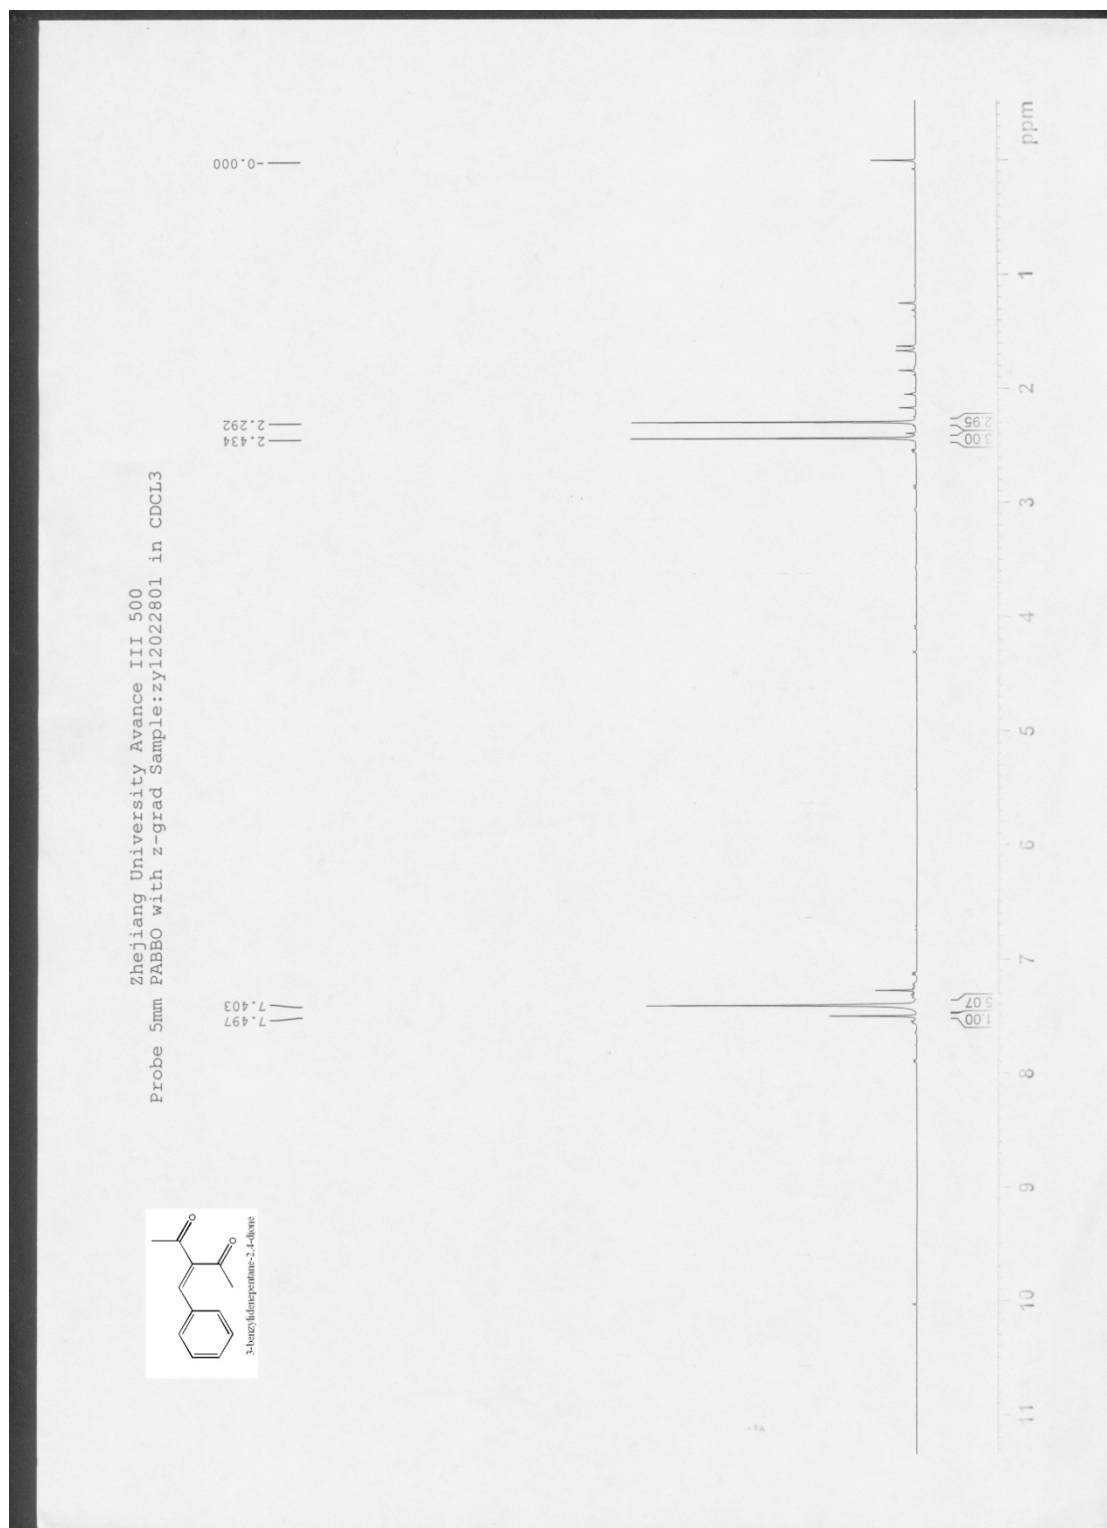

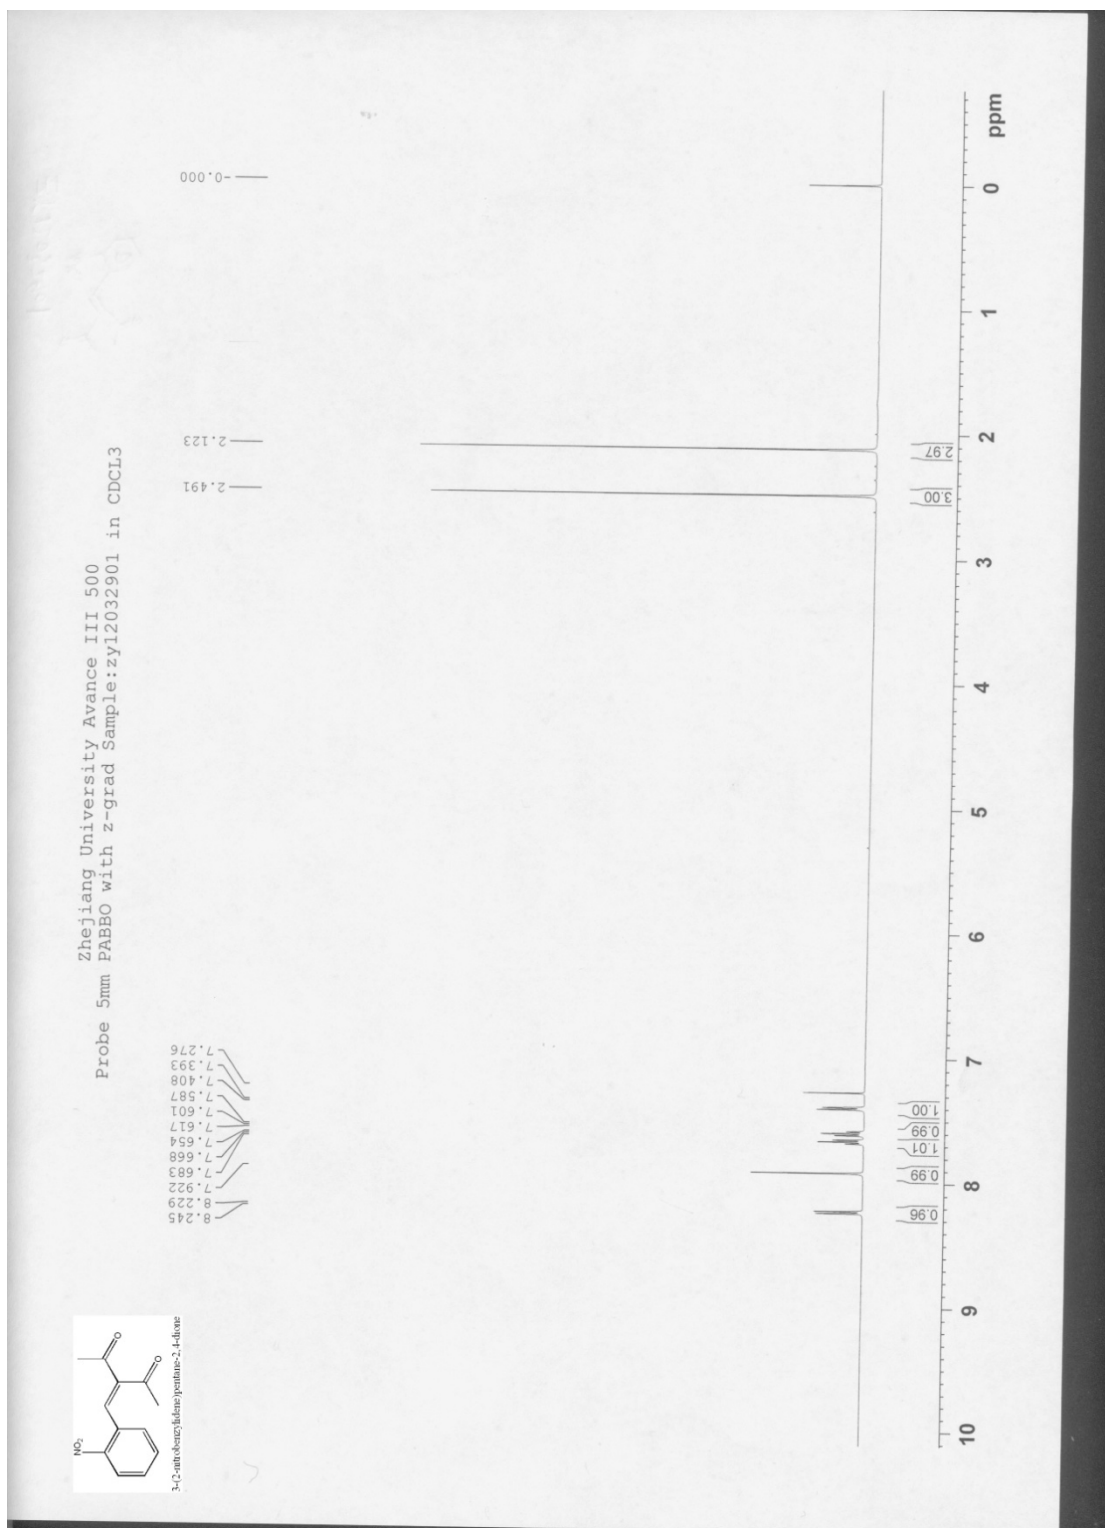

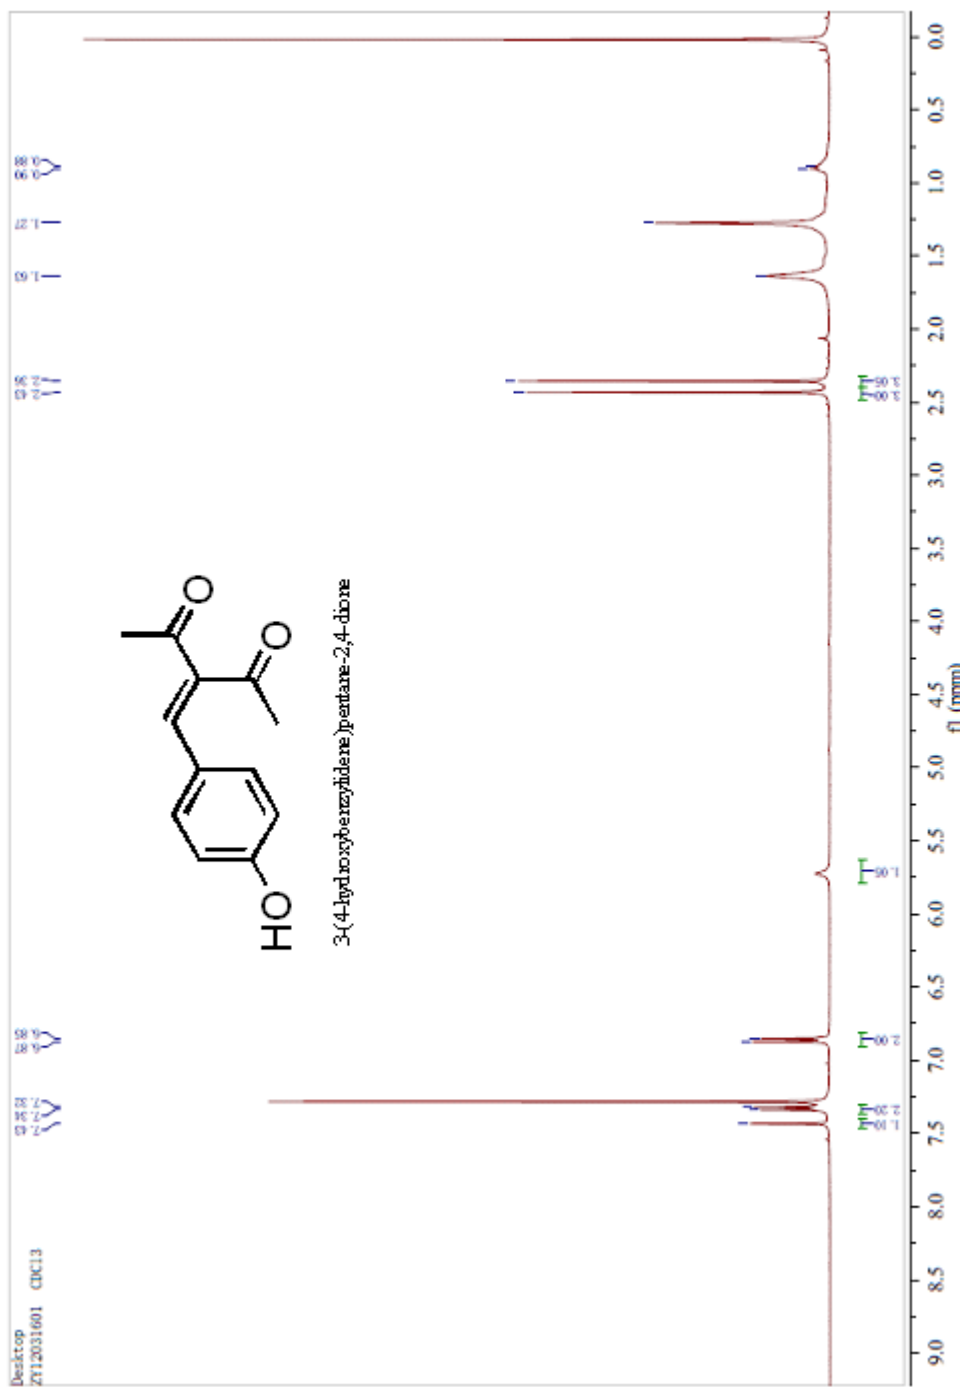

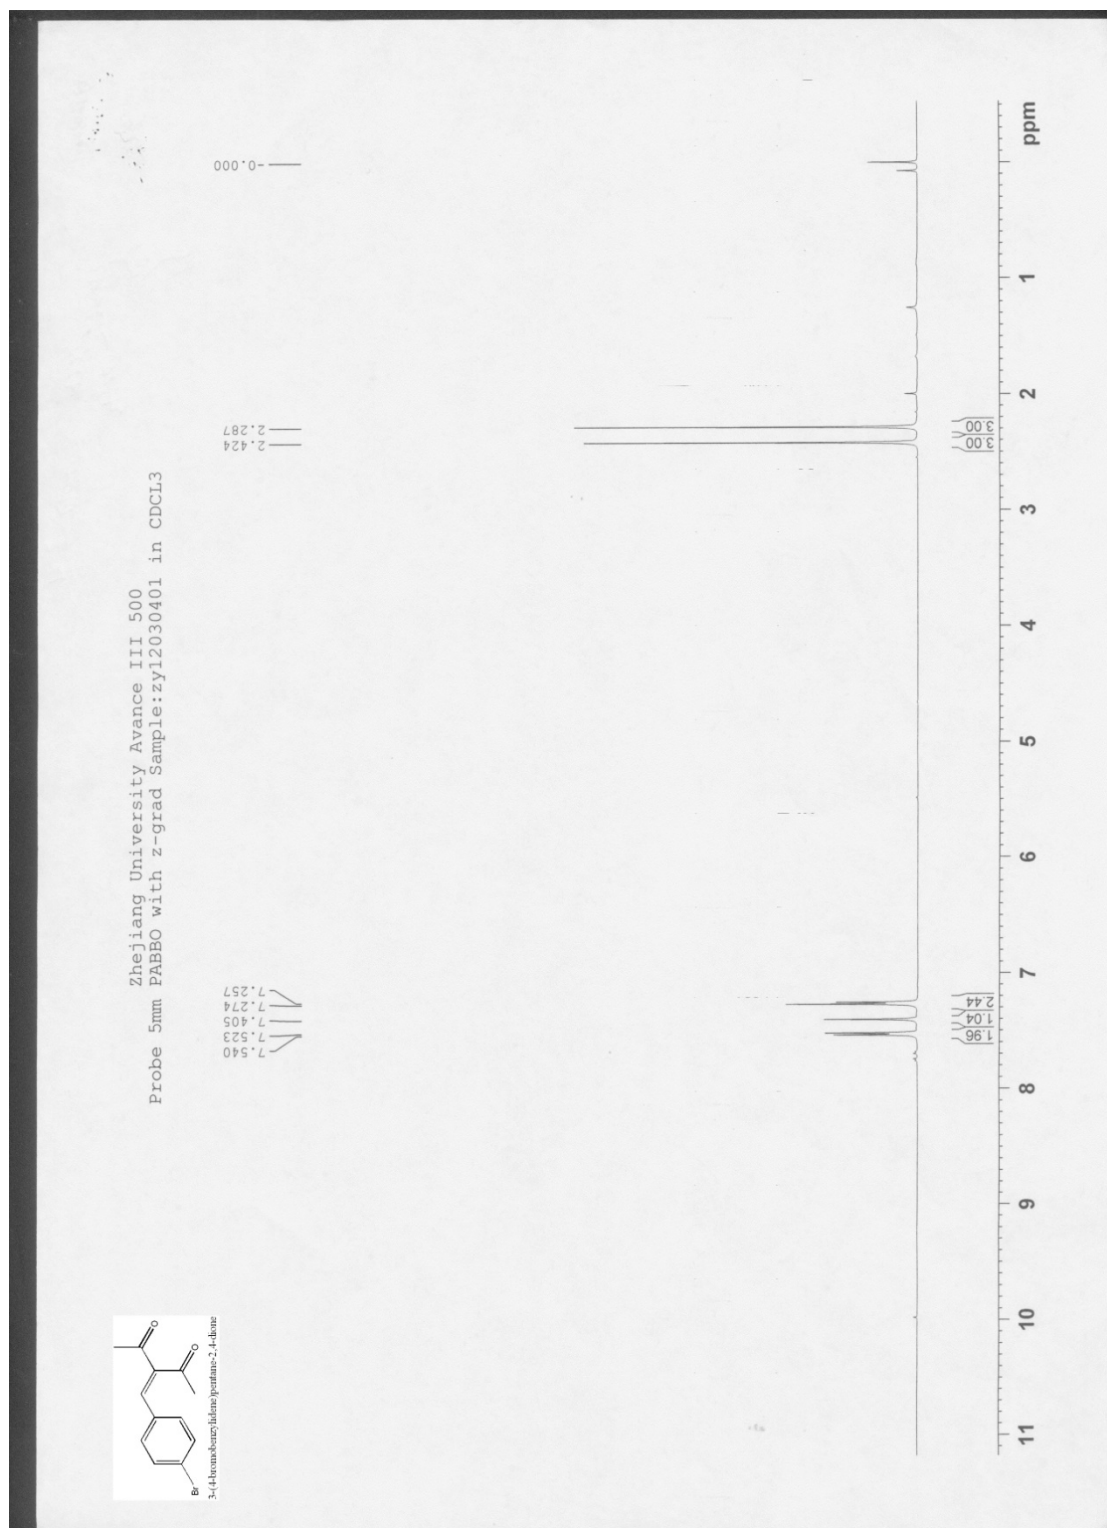



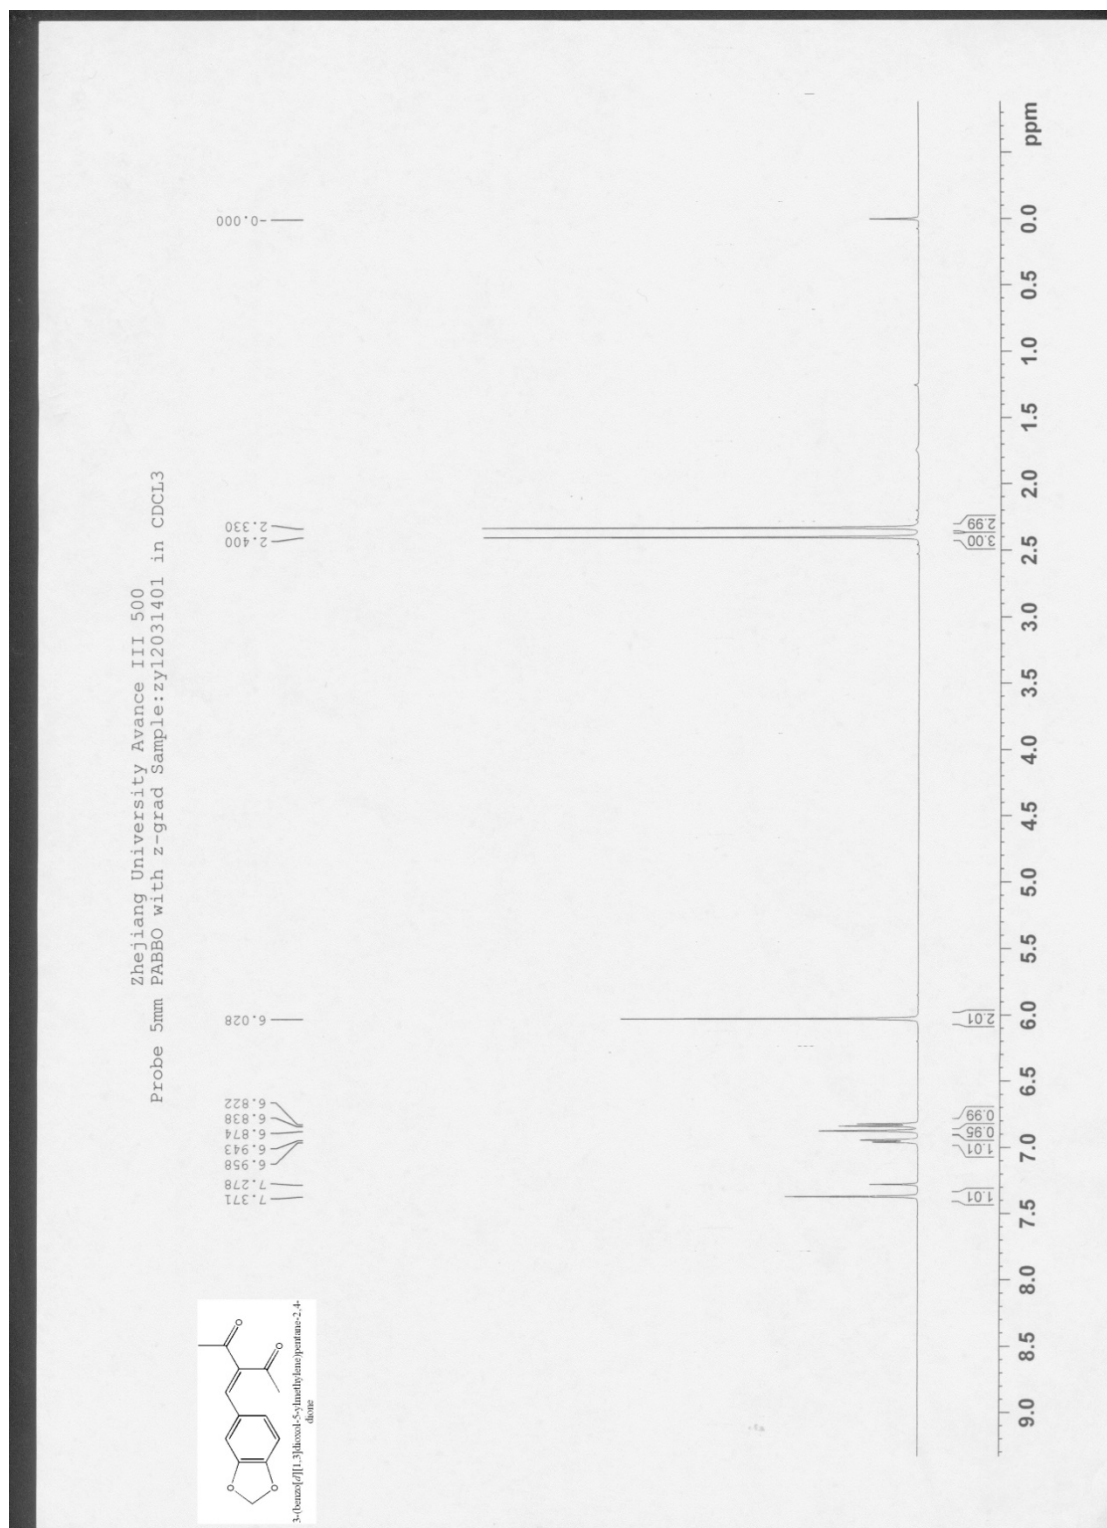



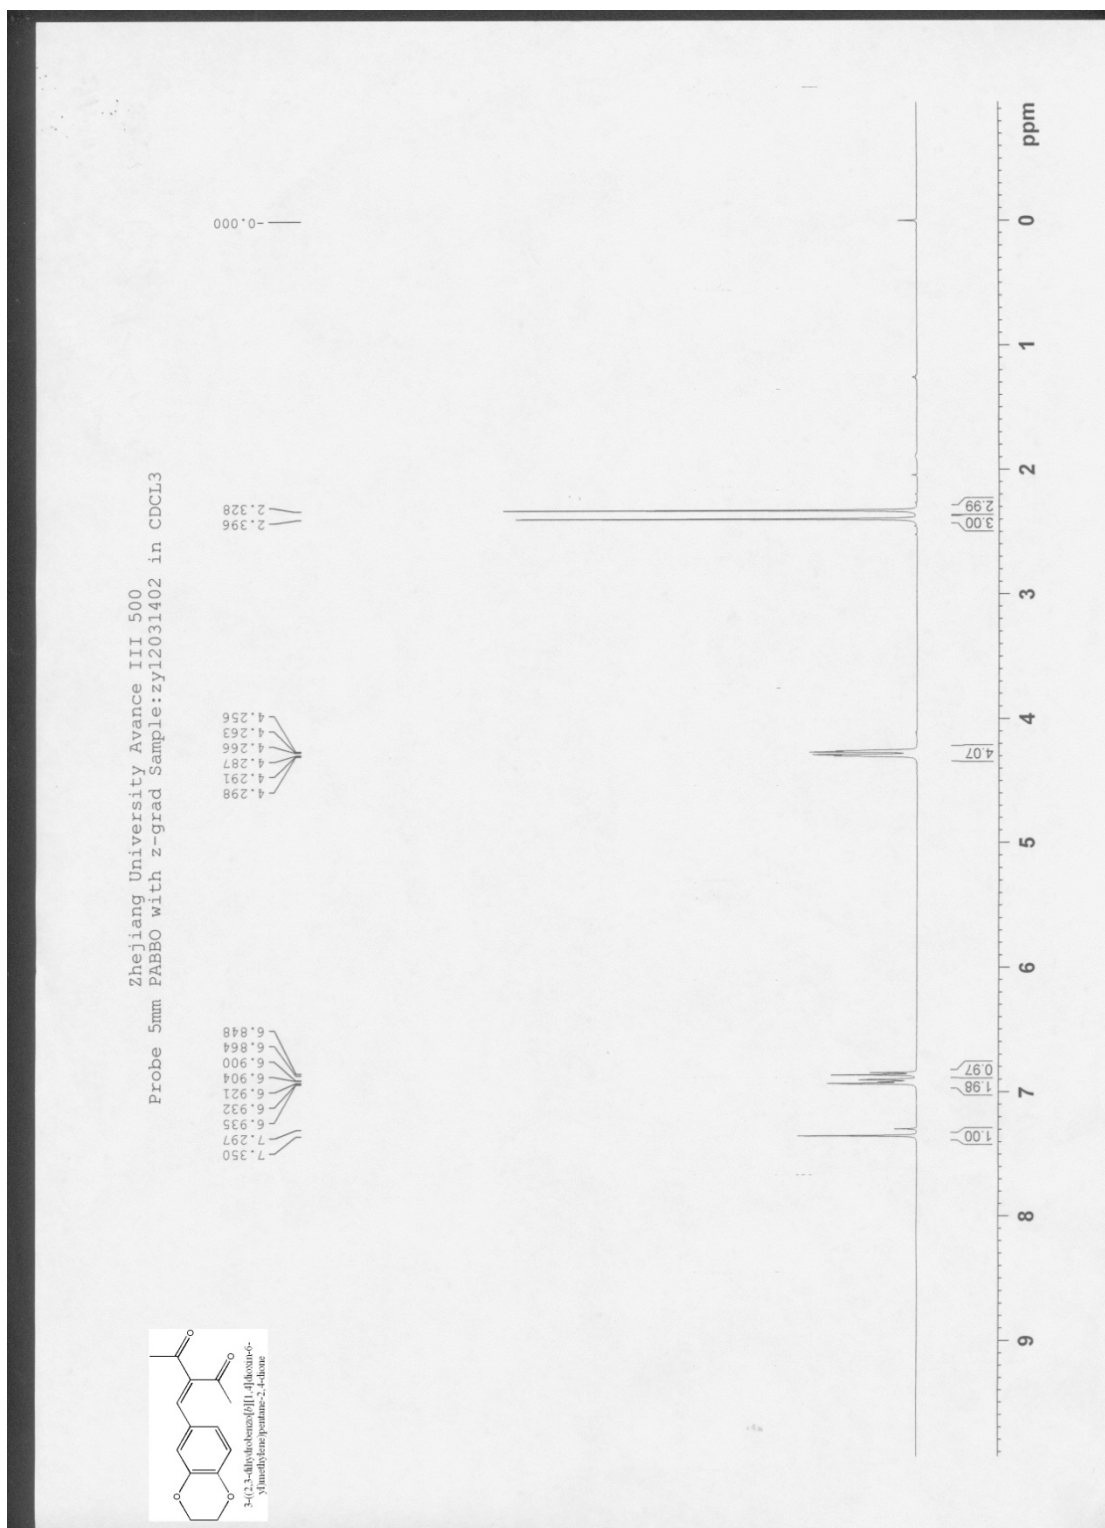

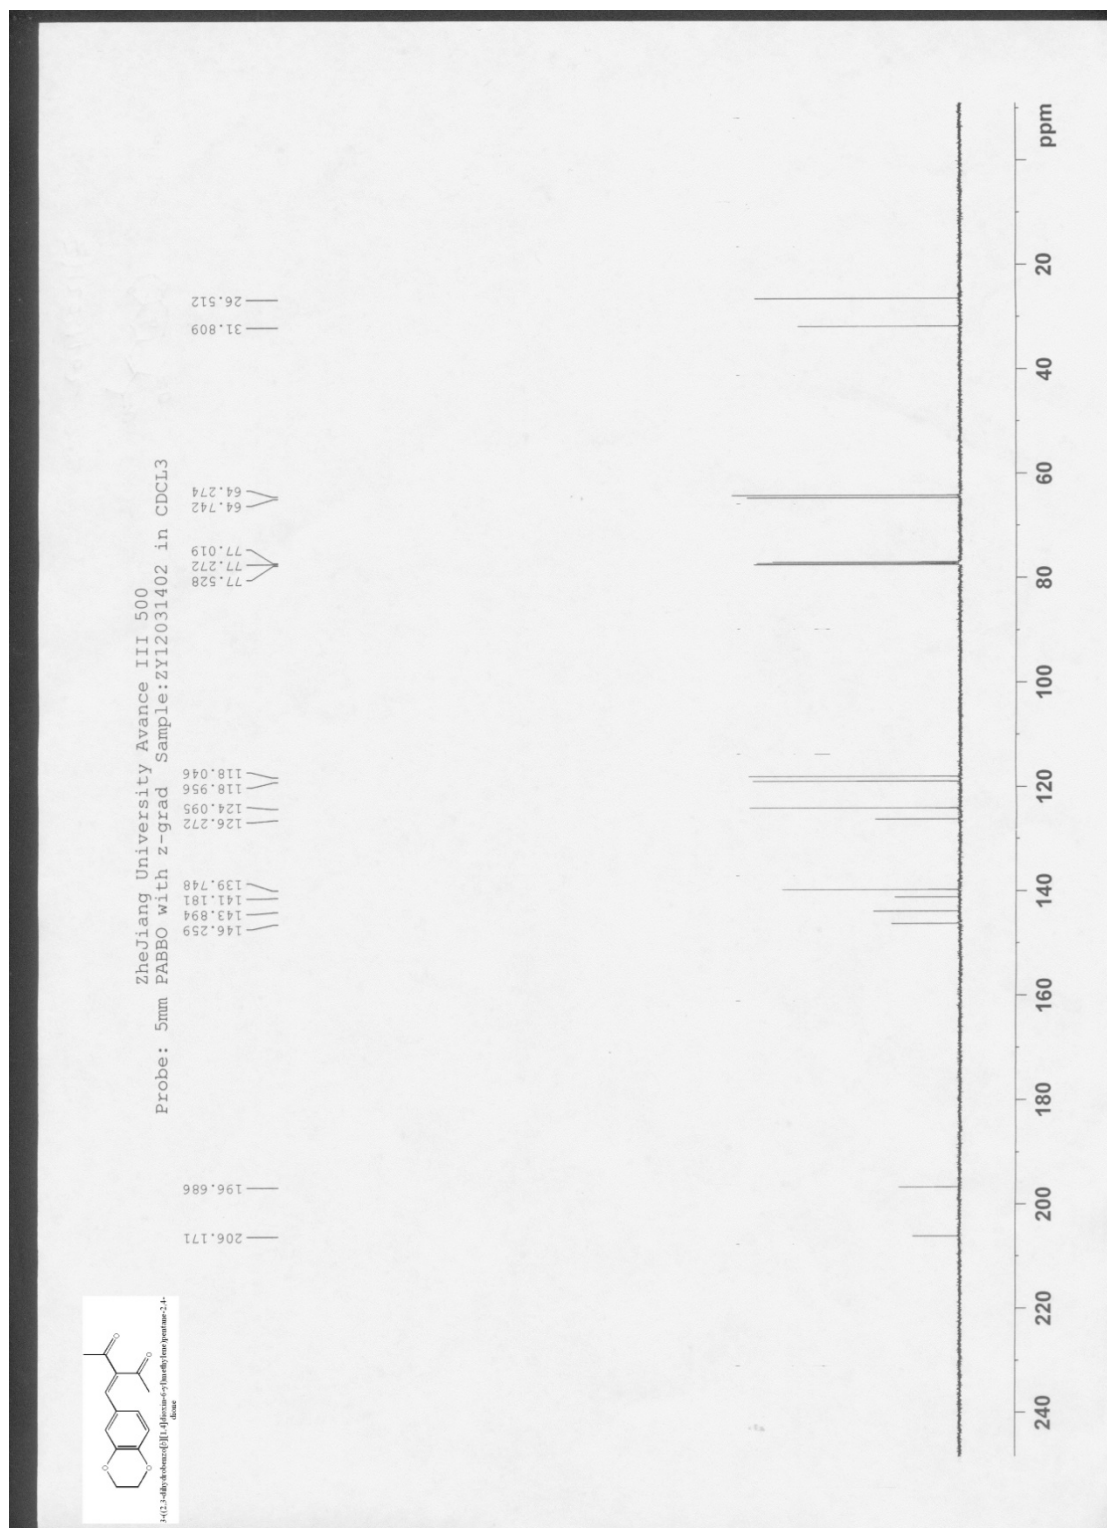

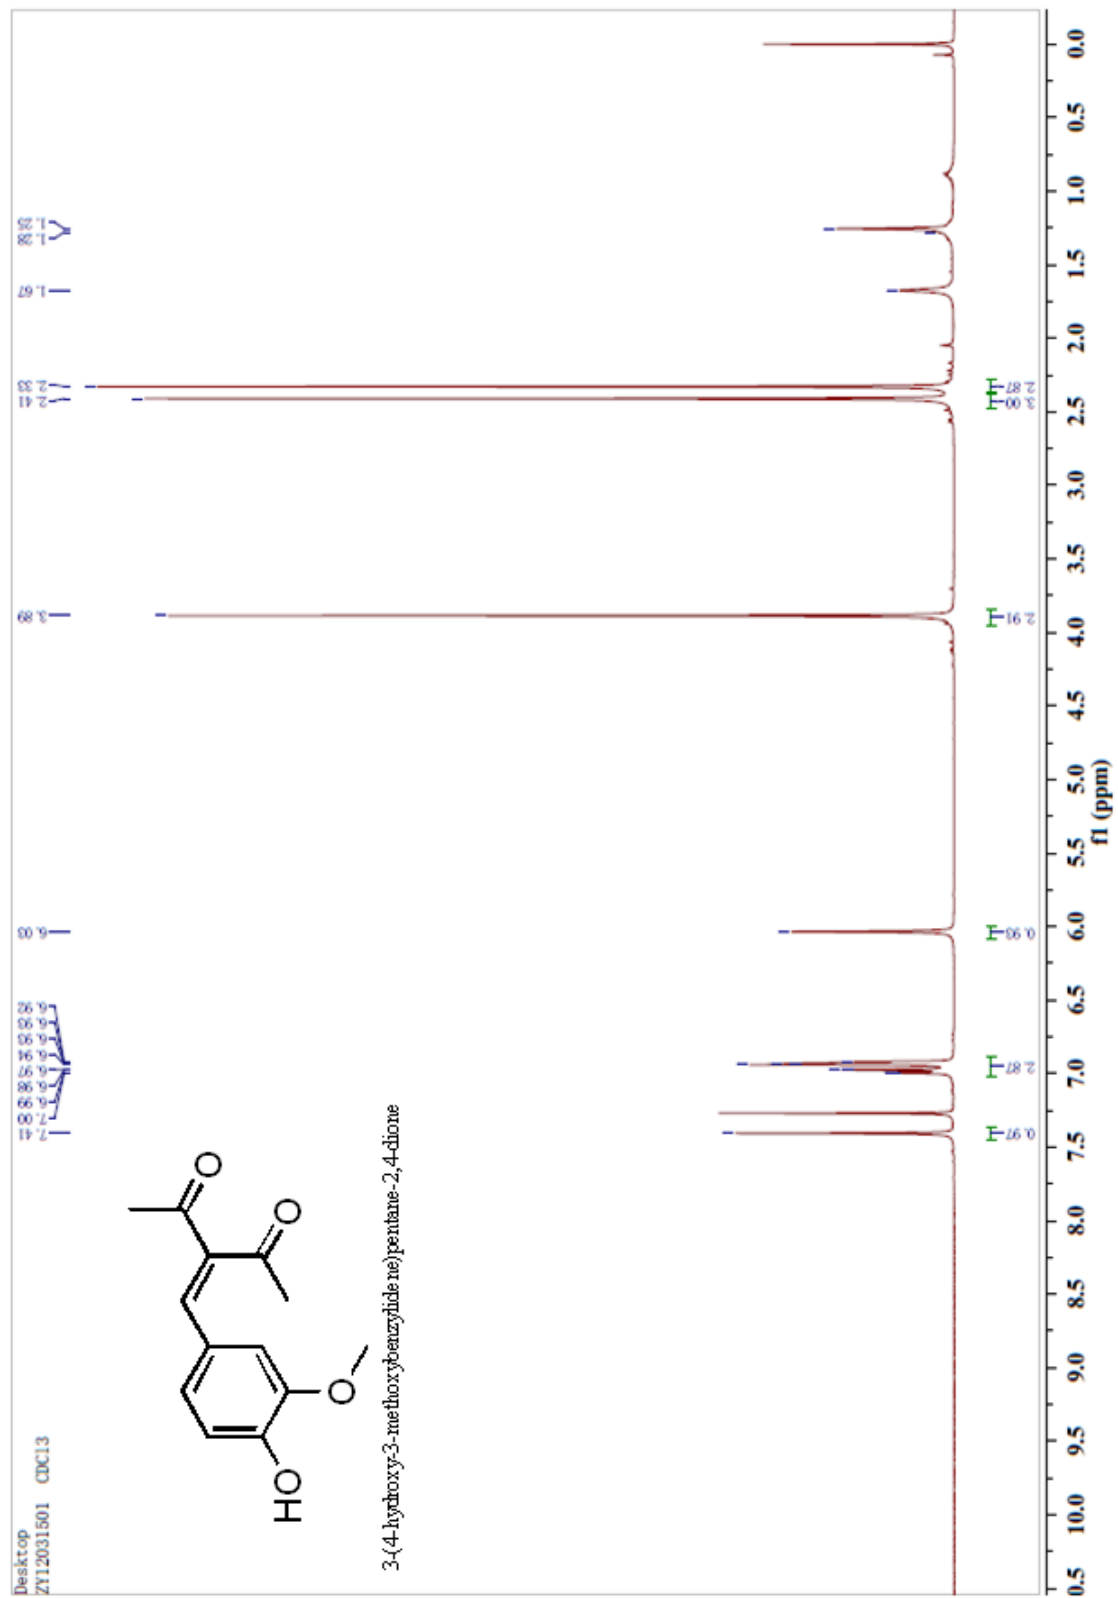

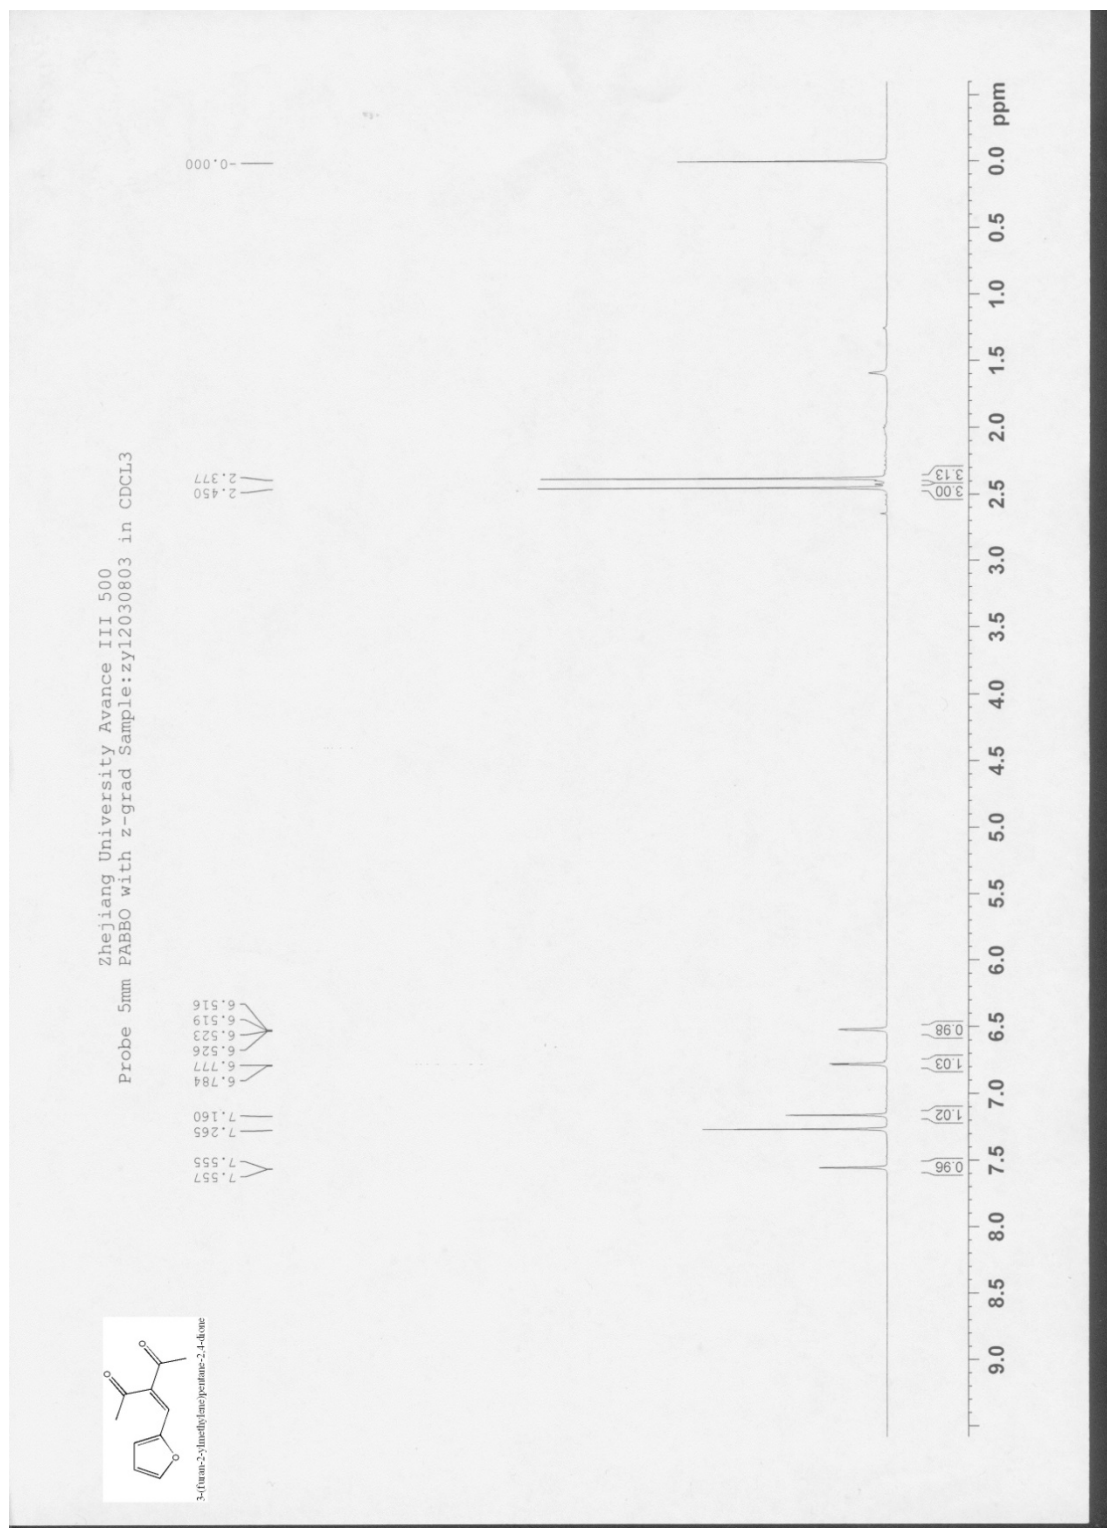



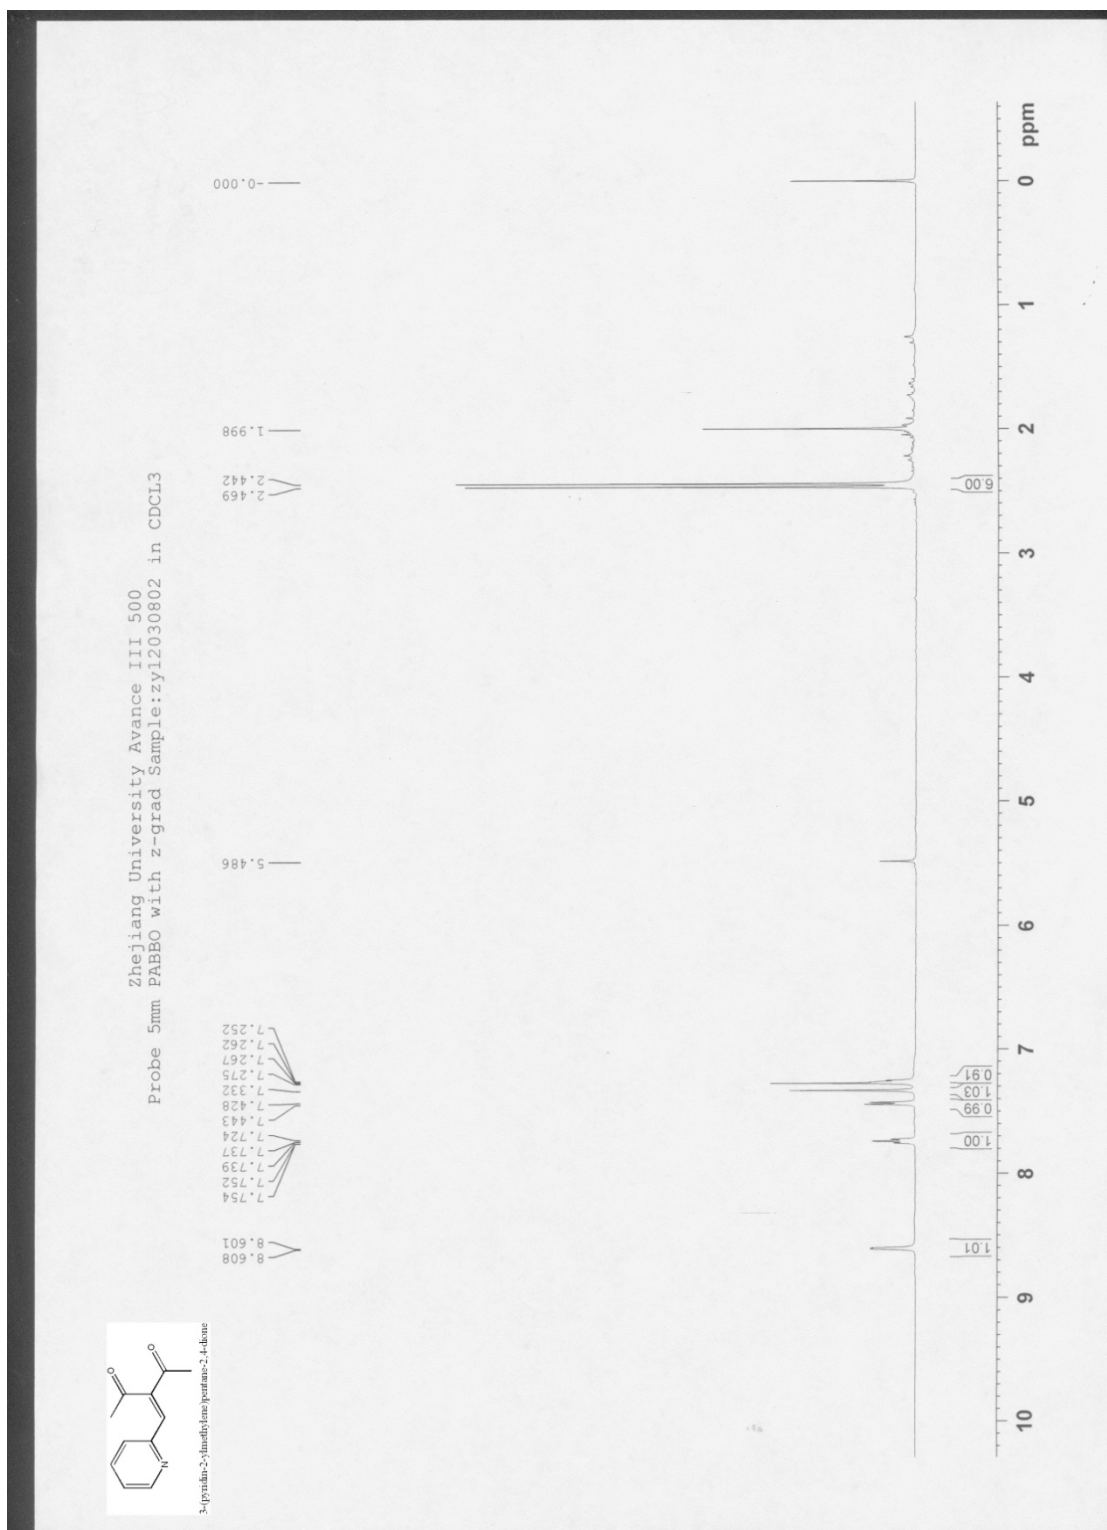

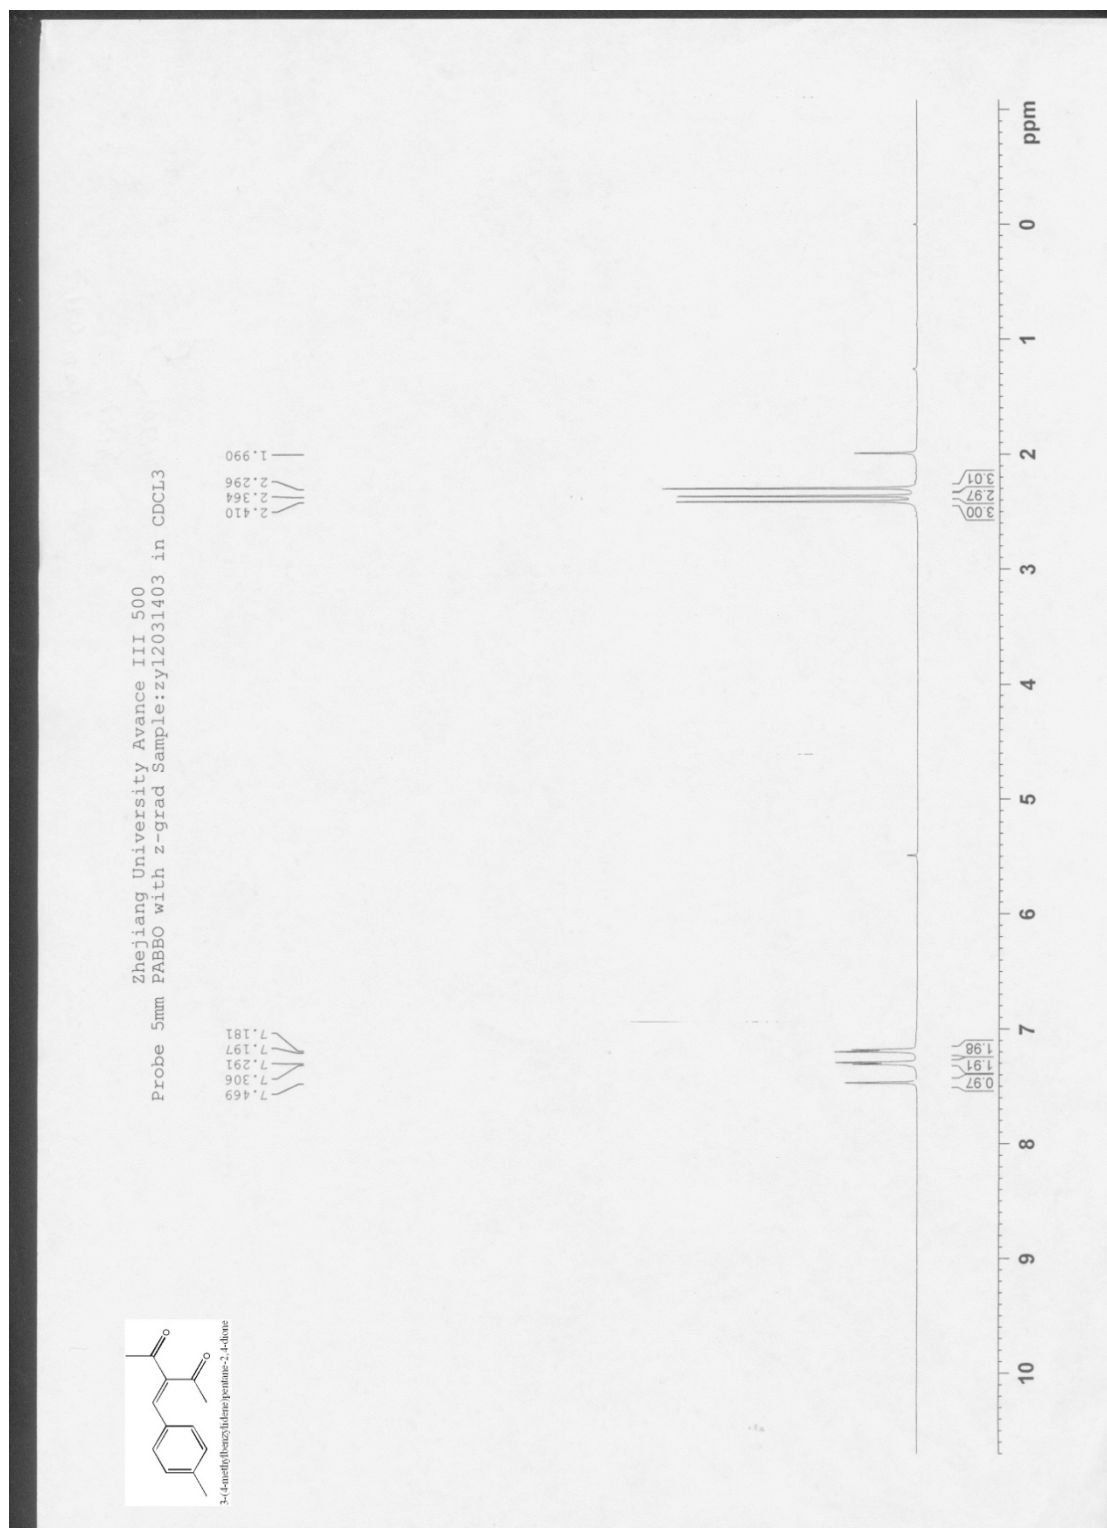

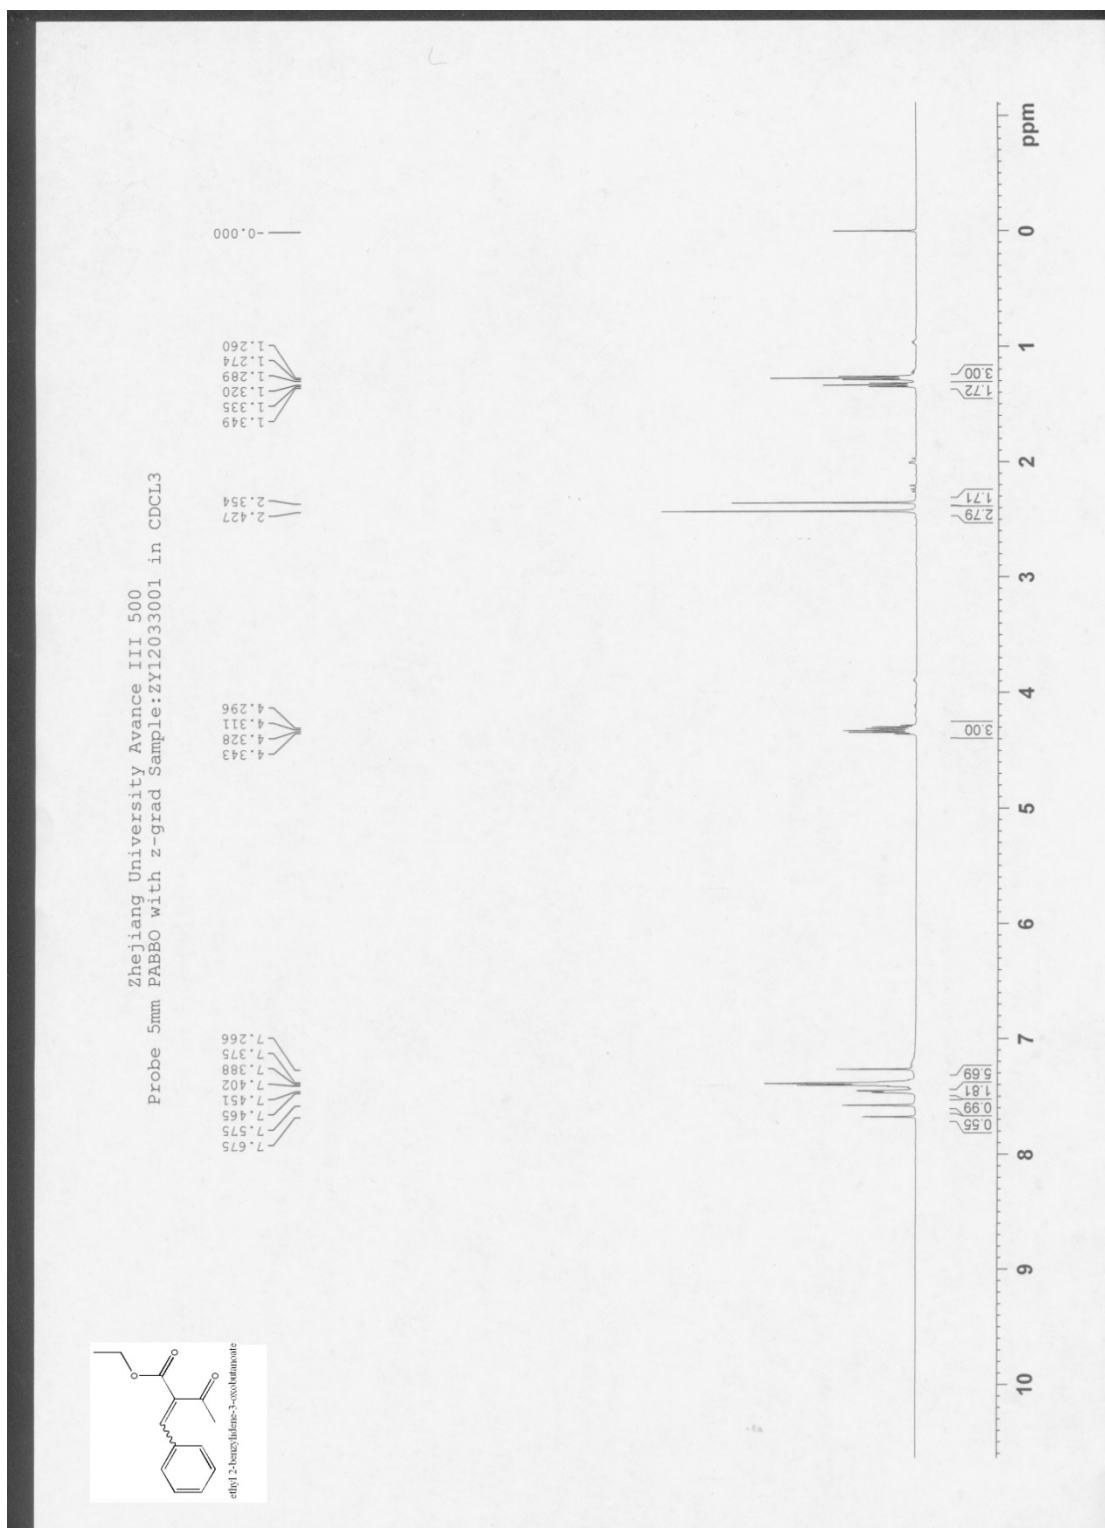



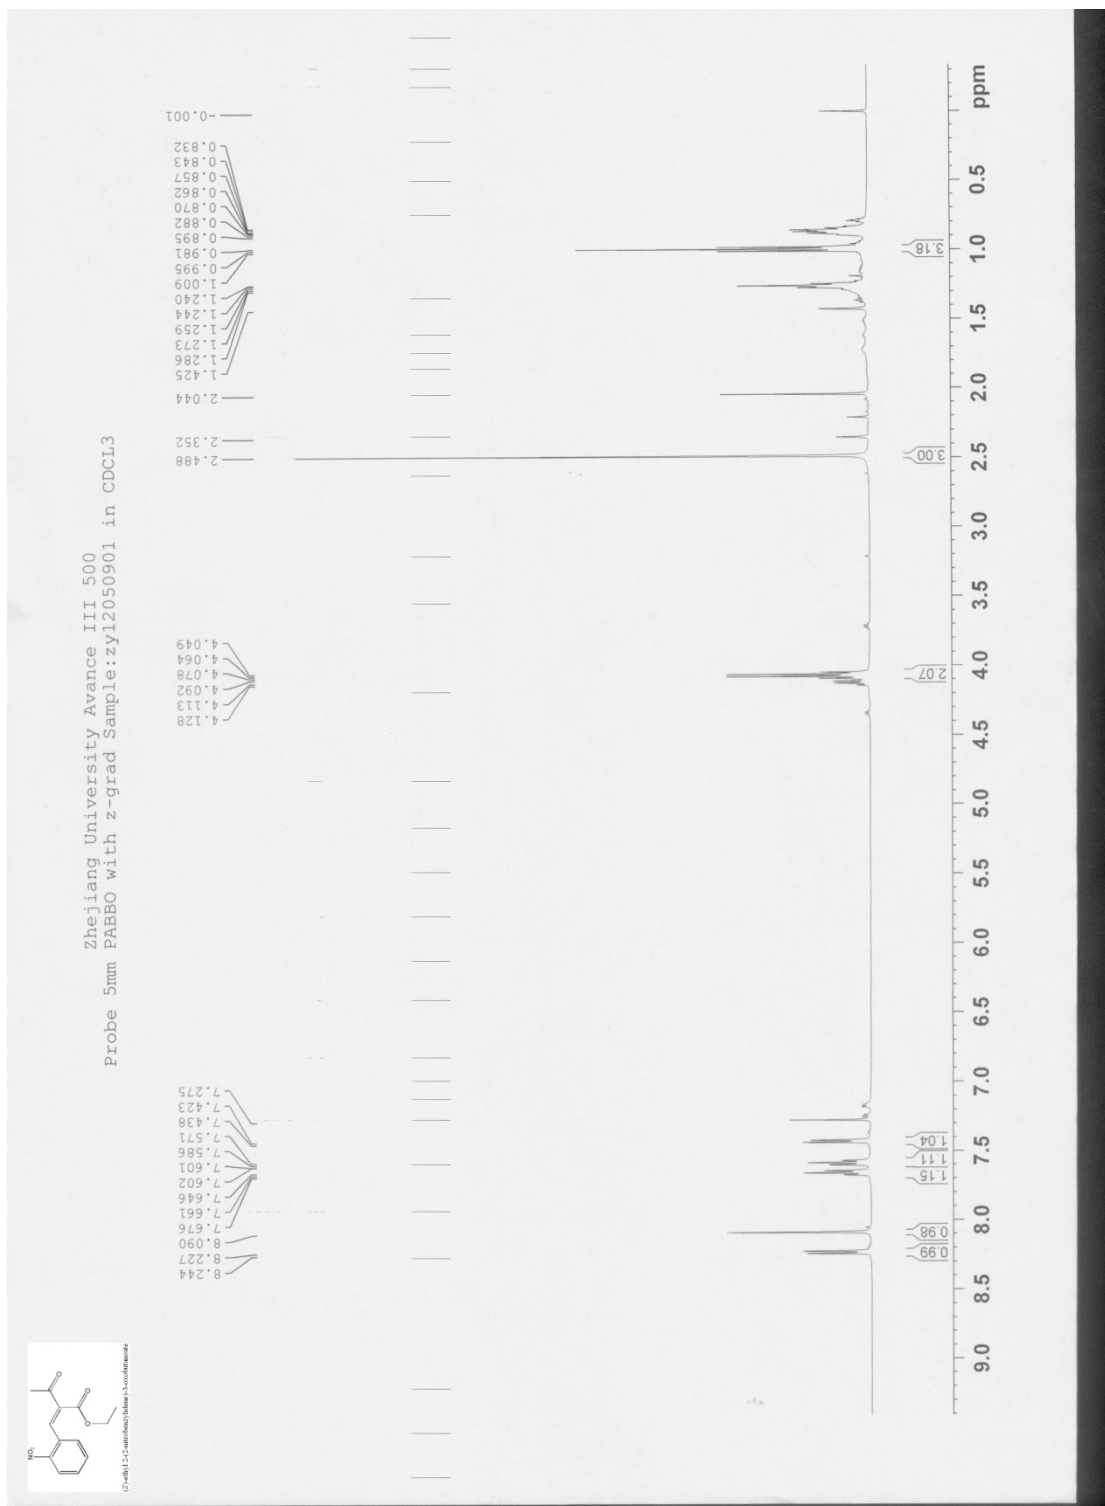

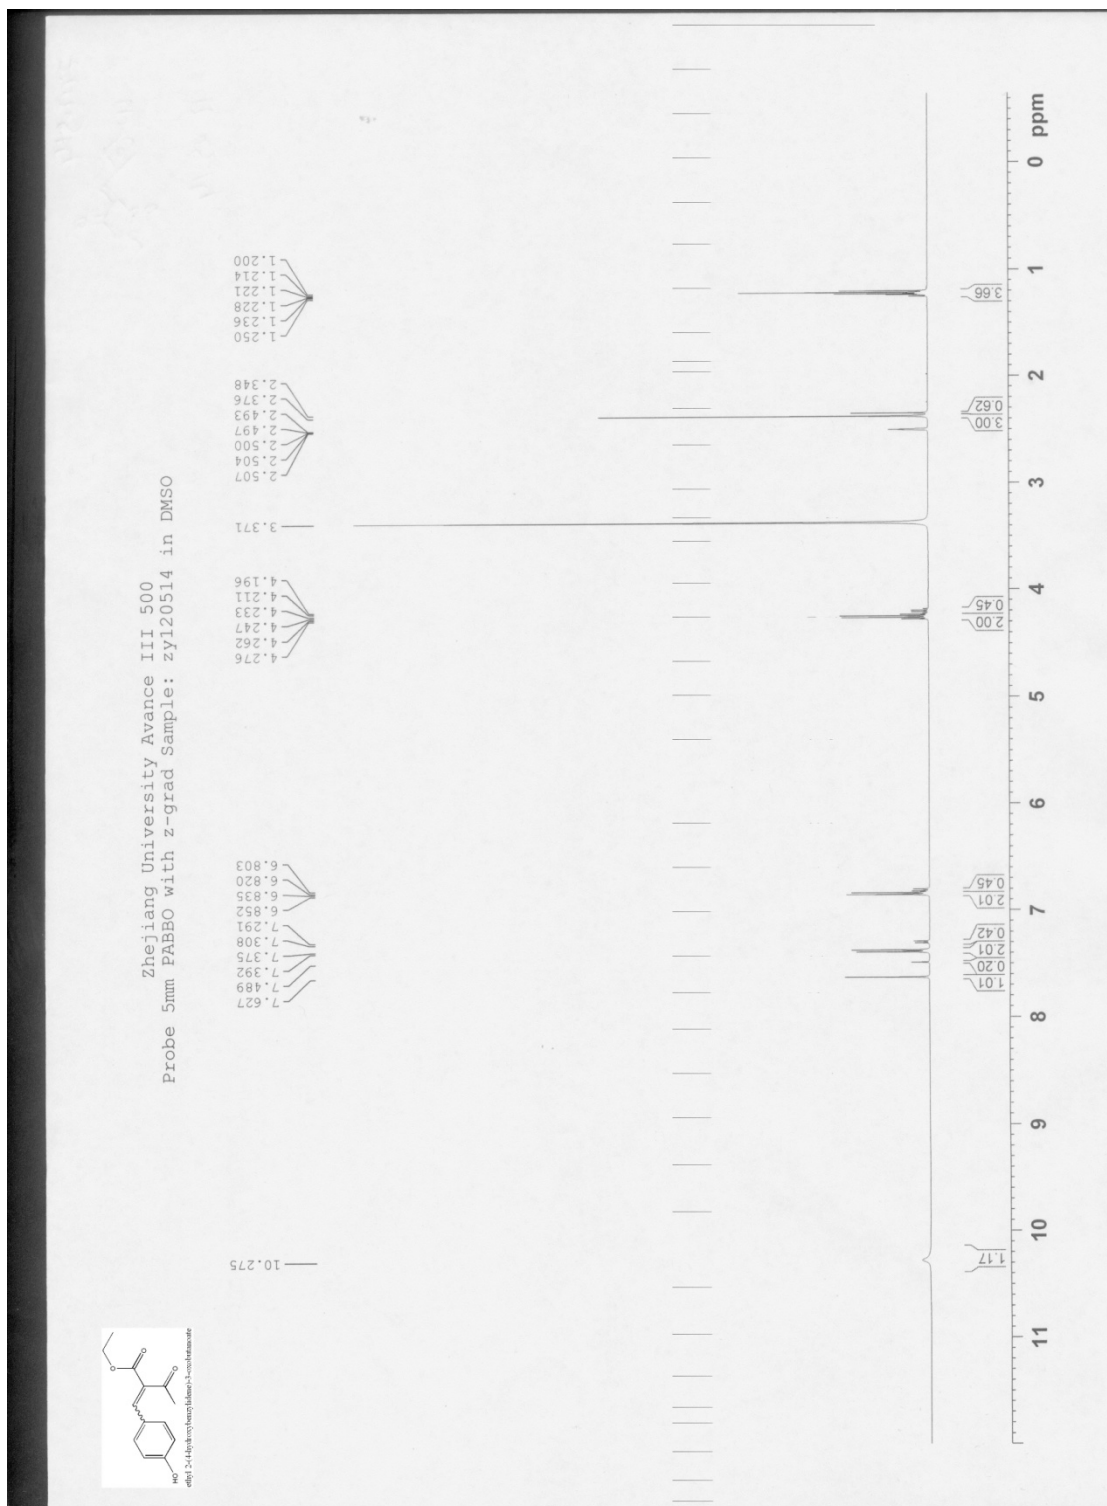

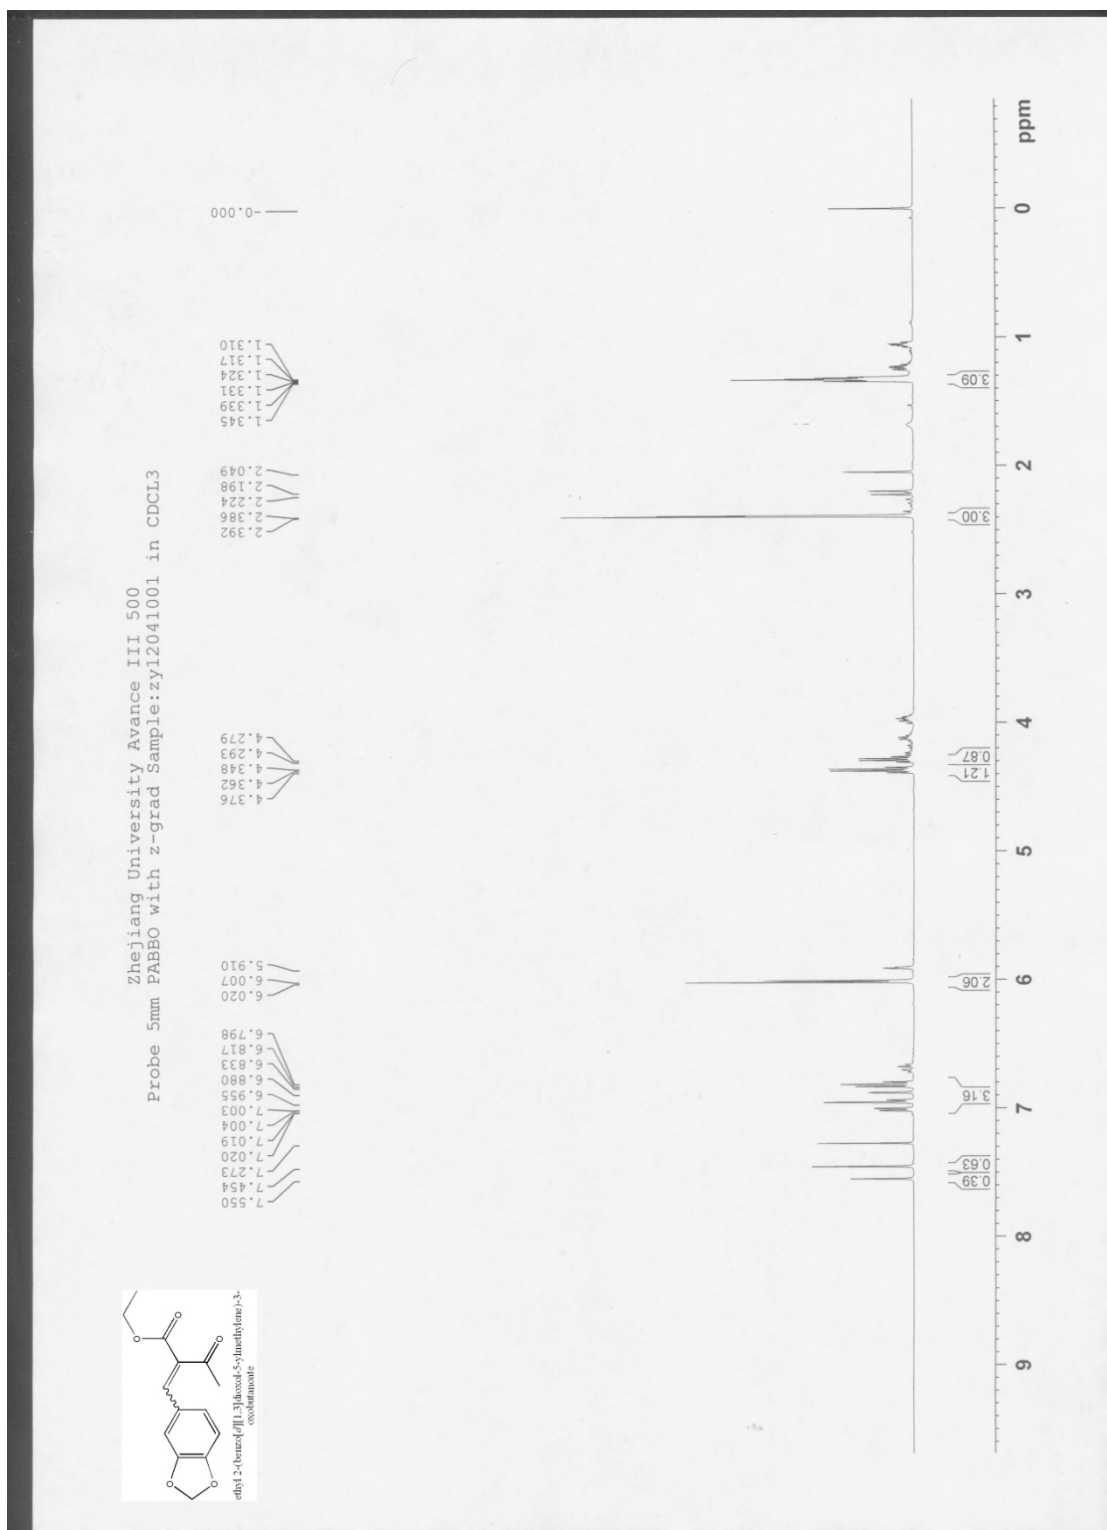

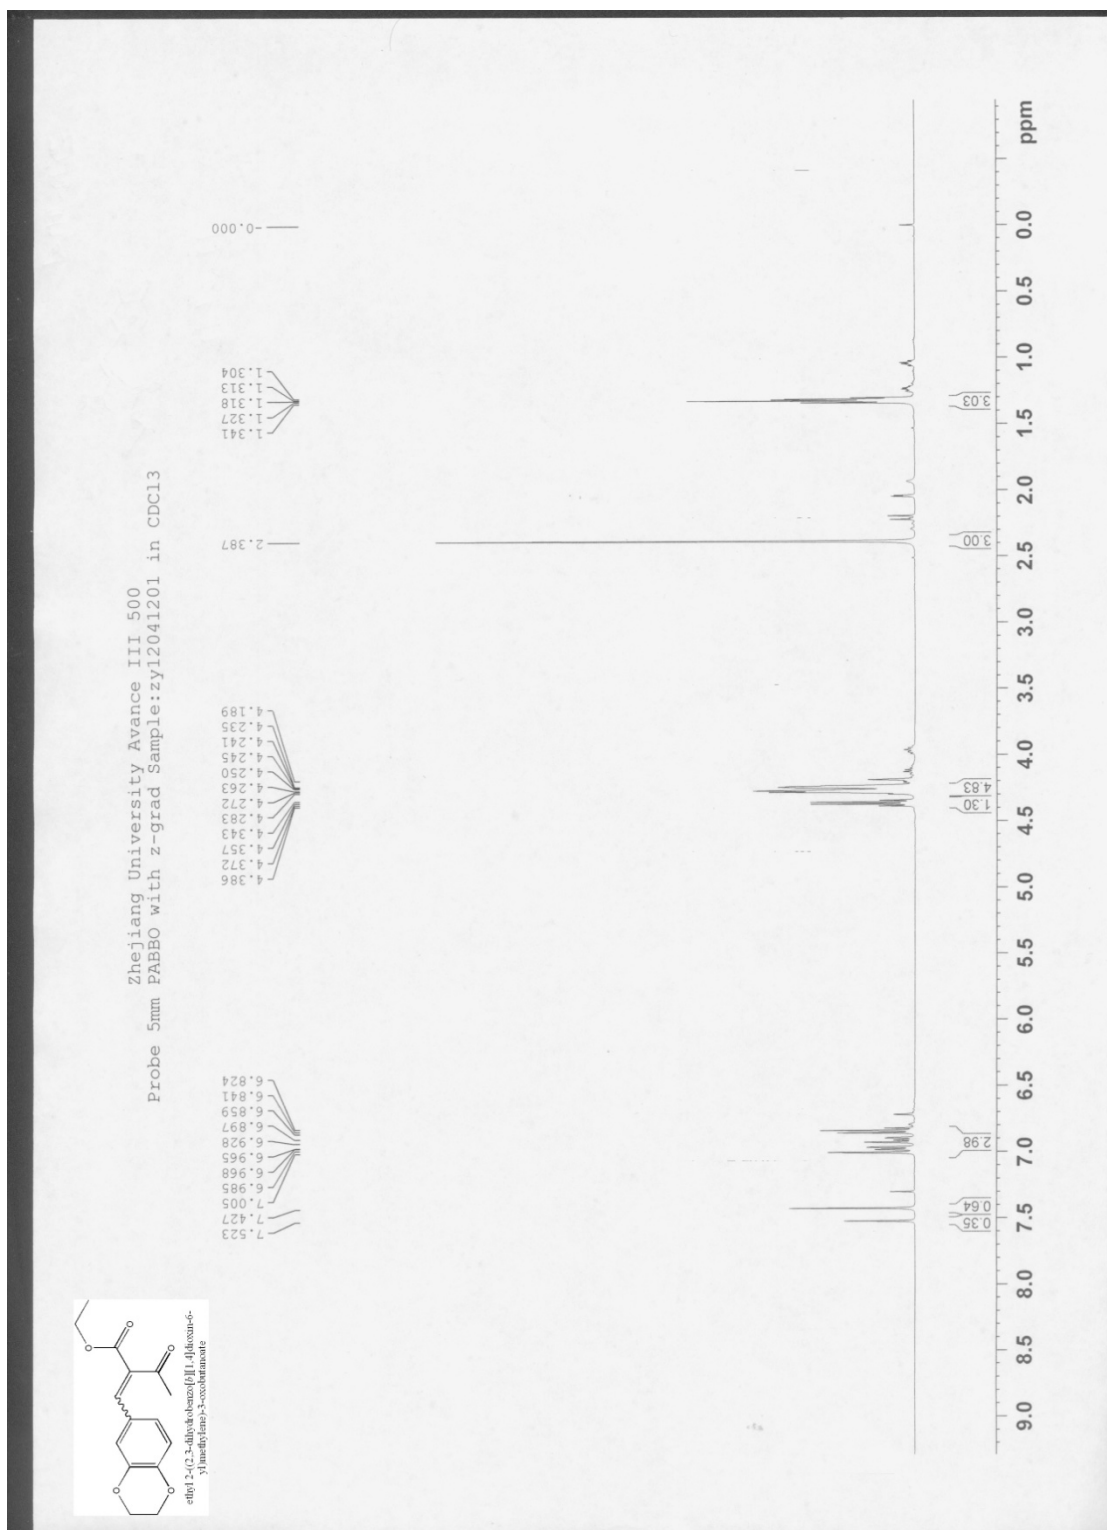



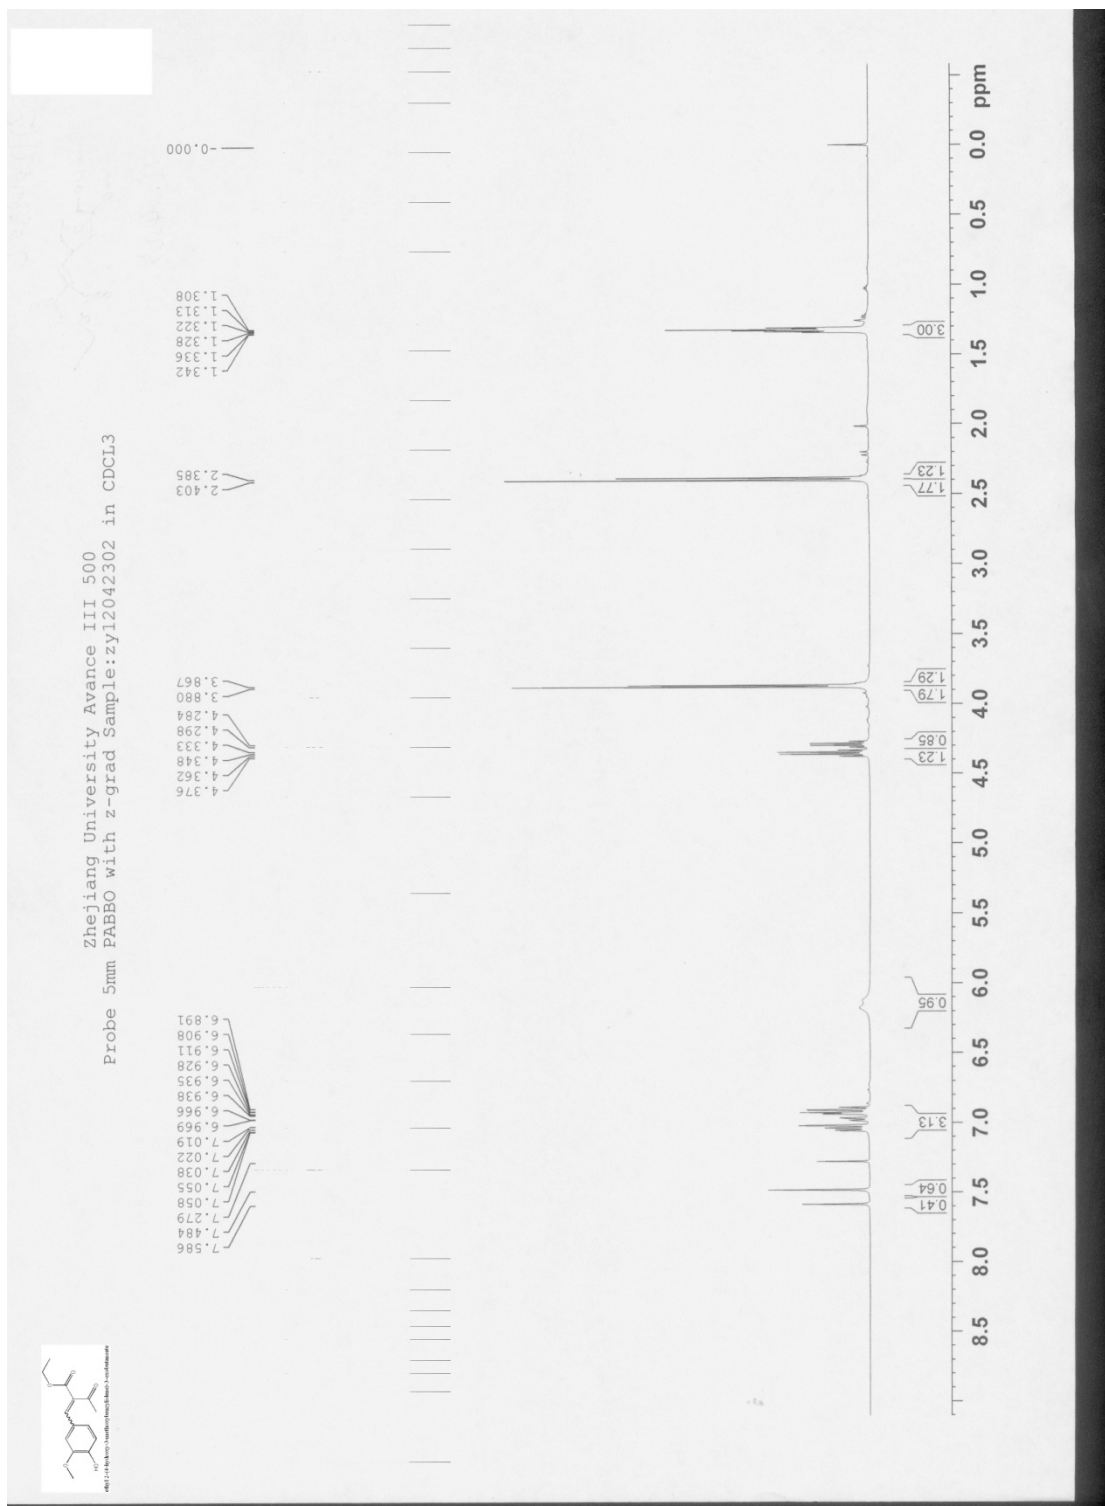

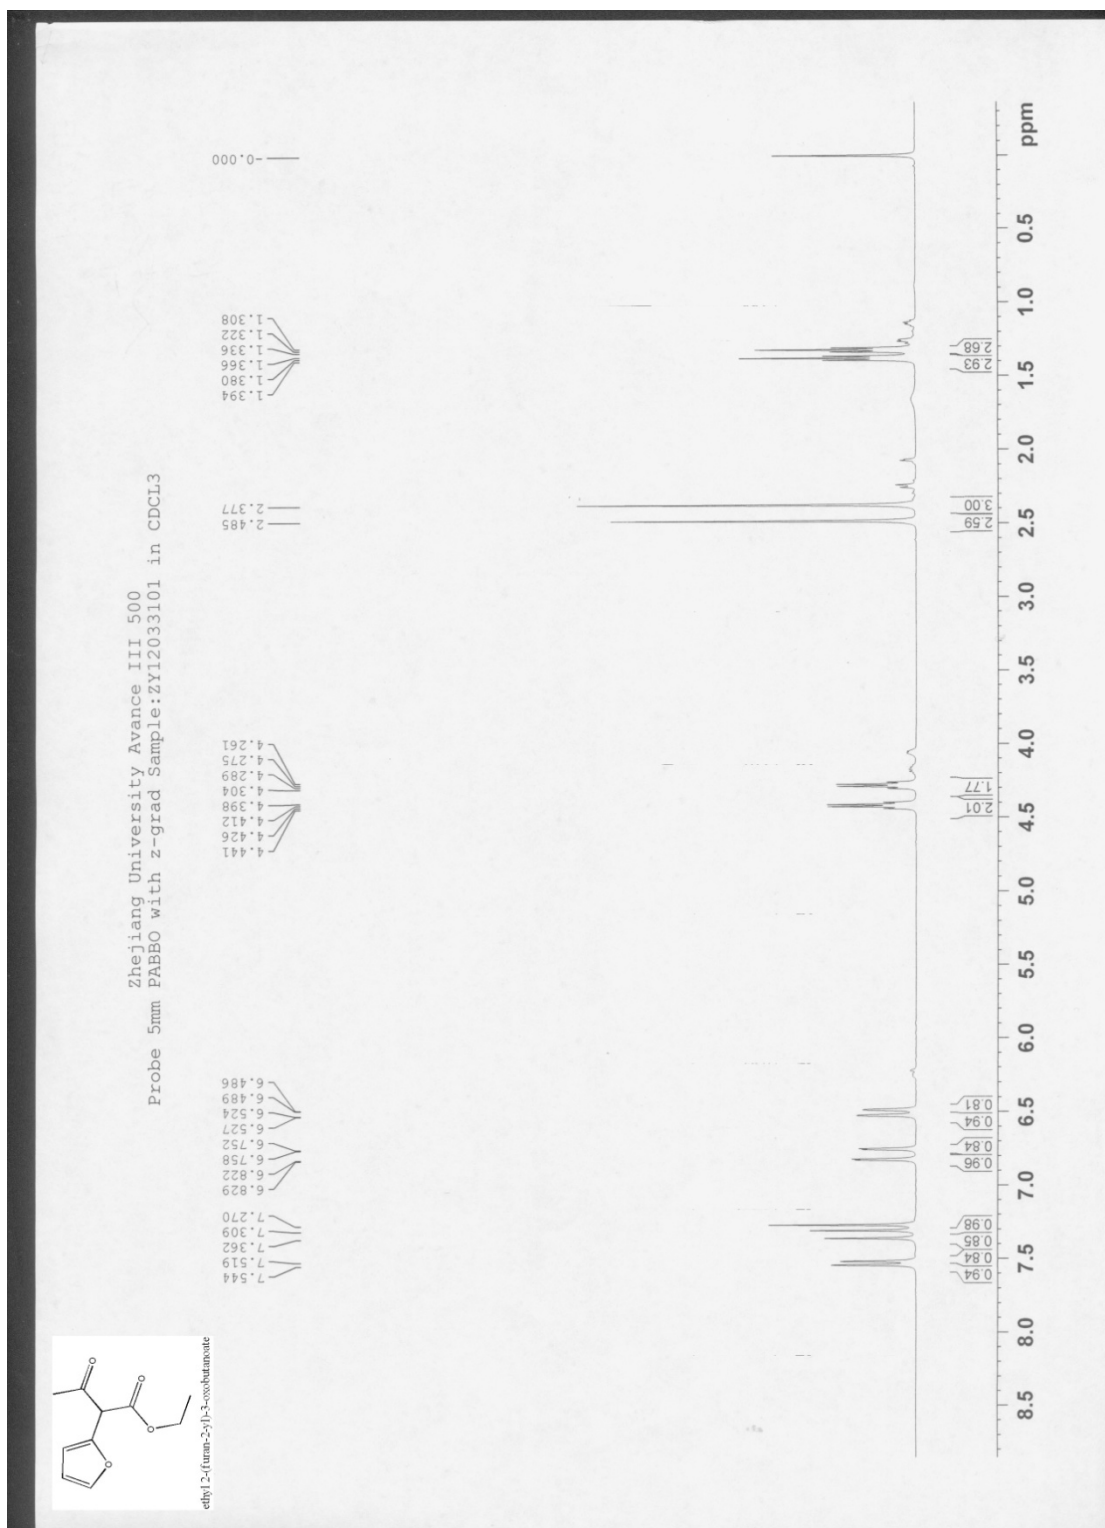

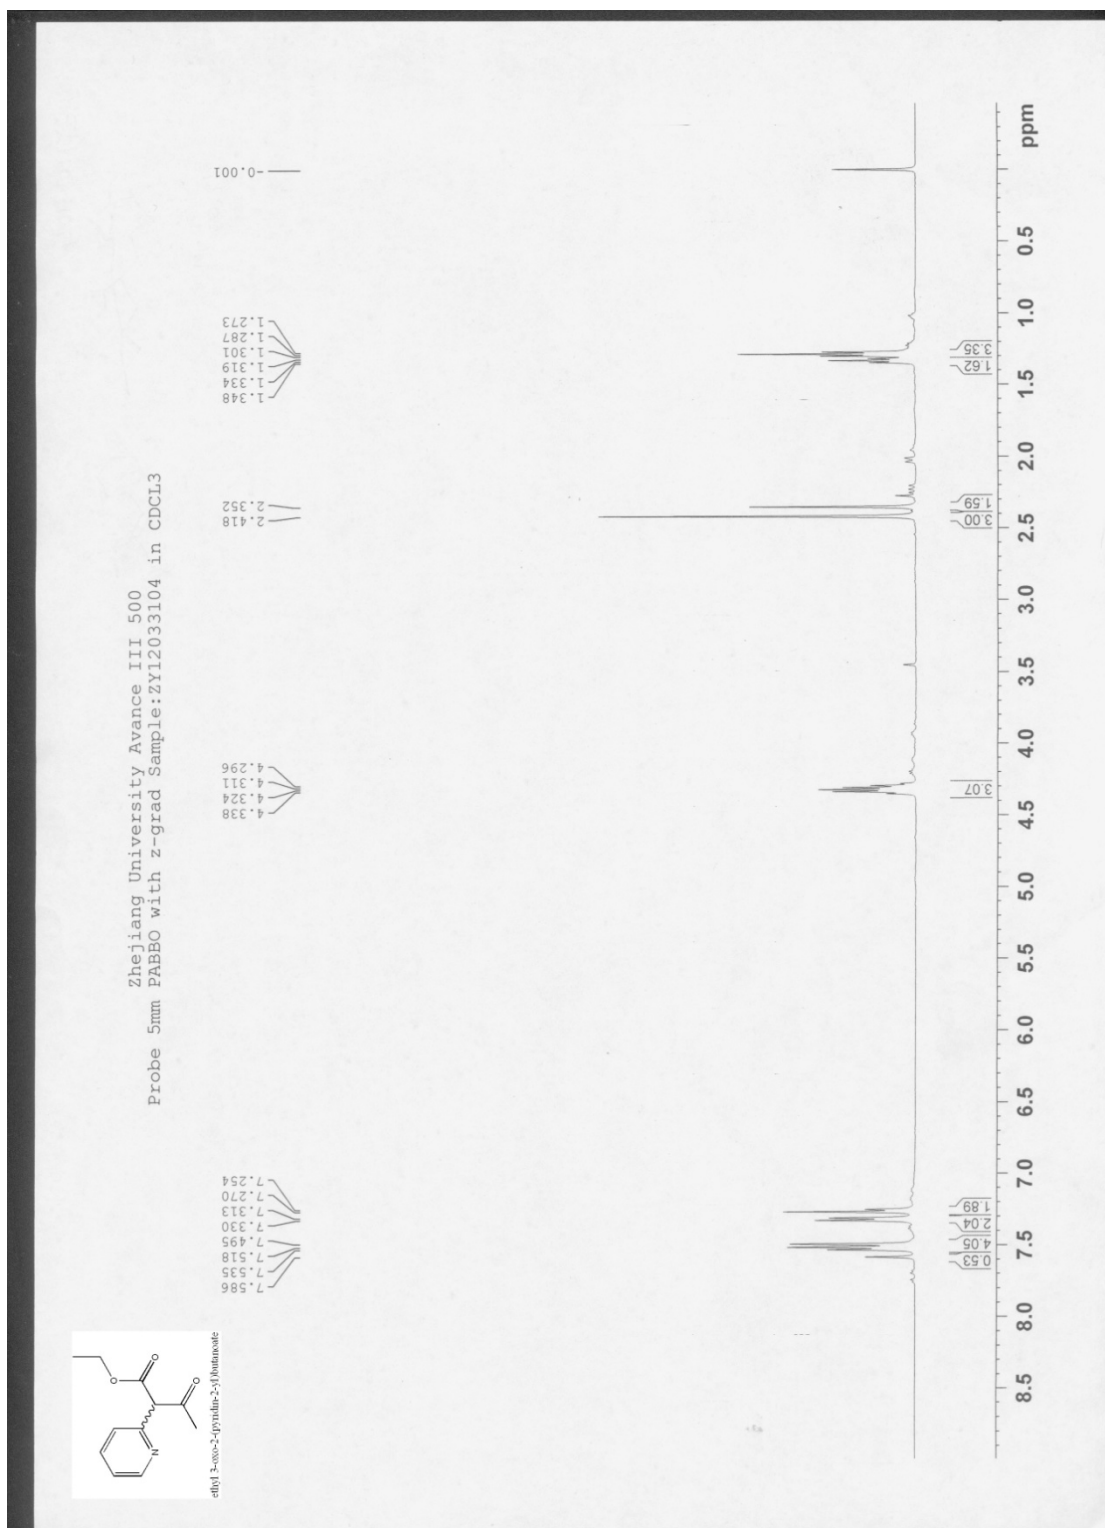



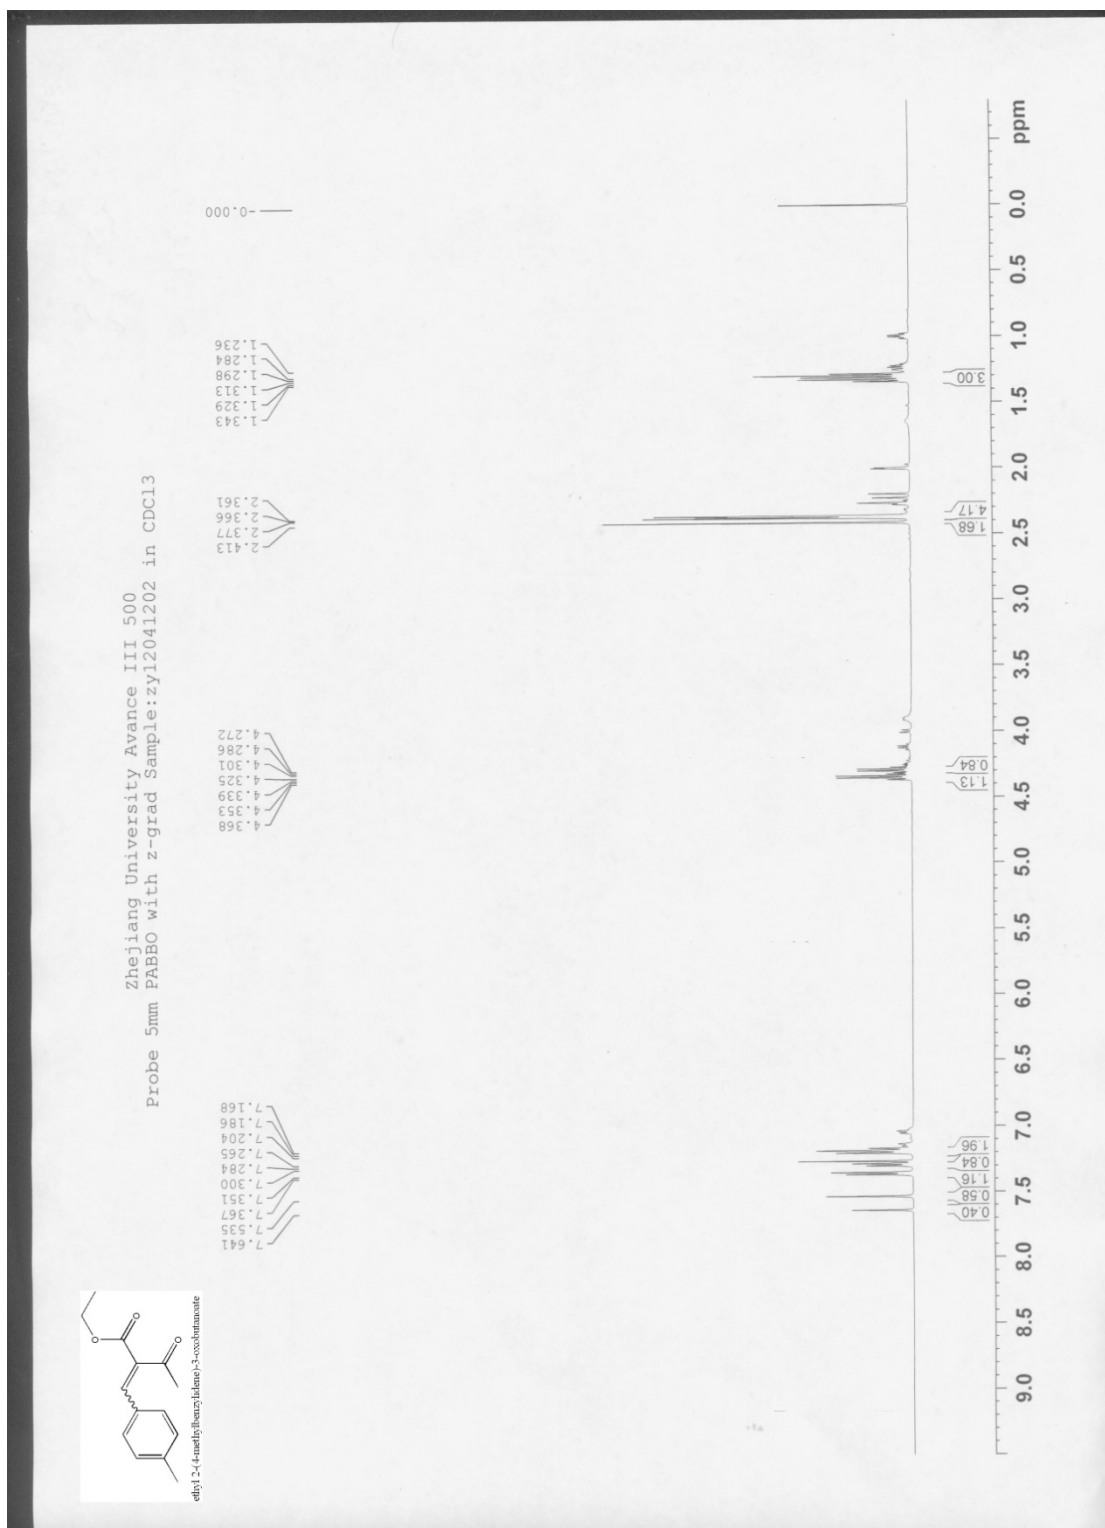

Tolerance = 0.4 mDa / DBE: min = -1.5, max = 50.0  
Element prediction: Off

Monoisotopic Mass, Odd and Even Electron Ions  
17 formula(e) evaluated with 1 results within limits (up to 50 best isotopic matches for each mass)

Elements Used:

C: 0-100 H: 0-300 O: 0-4

23-Apr-2012GCTPremier Zhejiang University

zr-120423 111 (1.517)

TOF MS EI+  
2.52e+003

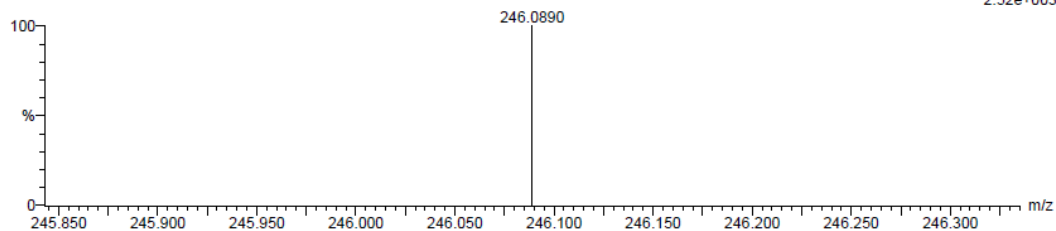

Minimum: -1.5  
Maximum: 0.4 0.8 50.0

| Mass     | Calc. Mass | mDa  | PPM  | DBE | i-FIT     | Formula    |
|----------|------------|------|------|-----|-----------|------------|
| 246.0890 | 246.0892   | -0.2 | -0.8 | 8.0 | 5547261.5 | C14 H14 O4 |

**HRMS spectrum of 3-((2,3-dihydrobenzo[b][1,4]dioxin-6-yl)methylene)pentane-2,4-dione**
